# Supplementary material for: Nano-NiFe2O4 catalyzed microwave assisted one-pot regioselective synthesis of novel 2-alkoxyimidazo[1,2-a]pyridines under aerobic conditions
Source: Royal Society of Chemistry journal article supplement (doi:10.1039/c5ra25540f), 2016-01-01
Supplement: c5ra25540f1.pdf [file c5ra25540f1.pdf]

**Electronic Supplementary Information**  
**for**  
**Nano-NiFe<sub>2</sub>O<sub>4</sub> catalyzed microwave assisted one-pot regioselective**  
**synthesis of novel 2-alkoxyimidazo[1,2-*a*] pyridines under aerobic**  
**conditions**

**Soumen Payra, Arijit Saha and Subhash Banerjee\***

| <b>Sl. No.</b> | <b>Content</b>                                                                                                | <b>Page No.</b> |
|----------------|---------------------------------------------------------------------------------------------------------------|-----------------|
| ESI1           | Method for the preparation of nano-NiFe <sub>2</sub> O <sub>4</sub>                                           | <b>02</b>       |
| ESI2           | Characterization of nano-NiFe <sub>2</sub> O <sub>4</sub> :                                                   |                 |
|                | EDAX of nano-NiFe <sub>2</sub> O <sub>4</sub>                                                                 | <b>02</b>       |
|                | FESEM image of nano-NiFe <sub>2</sub> O <sub>4</sub>                                                          | <b>03</b>       |
|                | FT-IR Spectra of nano-NiFe <sub>2</sub> O <sub>4</sub>                                                        | <b>04</b>       |
| ESI3           | Preparation of CuFe <sub>2</sub> O <sub>4</sub> nanoparticles                                                 | <b>05</b>       |
| ESI4           | Preparation of CoFe <sub>2</sub> O <sub>4</sub> nanoparticles                                                 | <b>05</b>       |
| ESI5           | General information                                                                                           | <b>05</b>       |
| ESI6           | General method for the synthesis of 2-alkoxy-3-arylimidazo[1,2- <i>a</i> ]pyridines                           | <b>06</b>       |
| ESI7           | Spectroscopic ( <sup>1</sup> H NMR, <sup>13</sup> C NMR) data and elemental analysis of all compounds         | <b>7-11</b>     |
| ESI8           | Copy of <sup>1</sup> H NMR, <sup>13</sup> C NMR spectra of all imidazopyridine derivatives listed in Table 2. | <b>12-32</b>    |
| ESI9           | Details of recyclability of catalyst                                                                          | <b>33</b>       |
| ESI10          | References                                                                                                    | <b>34</b>       |

### ESI 1.Detailed method for the preparation of NiFe<sub>2</sub>O<sub>4</sub>:

The NiFe<sub>2</sub>O<sub>4</sub> nanoparticles were prepared by simple co-precipitation method<sup>[1]</sup> from easily available starting materials ferric chloride (FeCl<sub>3</sub>.6H<sub>2</sub>O) and nickel chloride (NiCl<sub>2</sub>.6H<sub>2</sub>O), distilled water and sodium hydroxide. In a typical synthetic protocol, 0.2 M (20 mL water) ferric chloride solution and 0.1 M (20 mL water) solution of nickel chloride were prepared and mixed under vigorous stirring for 2 h at 80 °C. After that, 0.3 M NaOH was added drop by drop into the solutions till the pH is reached upto 12 and brown colour precipitates were formed. Finally, the precipitates were separated by centrifugation and dried in hot air oven for 4 h at 100 °C. Then calcinated it at 550°C for 6 h. Formation of NiFe<sub>2</sub>O<sub>4</sub>NPs were confirmed by FT-IR, powder XRD, HR-TEM, FESEM and EDAX studies.

### ESI 2.Characterization of nano-NiFe<sub>2</sub>O<sub>4</sub>:

#### ESI 2.1.Energy-dispersive X-ray spectroscopy (EDAX) of nano-NiFe<sub>2</sub>O<sub>4</sub>

EDAX of nano-NiFe<sub>2</sub>O<sub>4</sub> proved that the material contains only Ni, Fe, O elements and no other impurities are observed in the material.

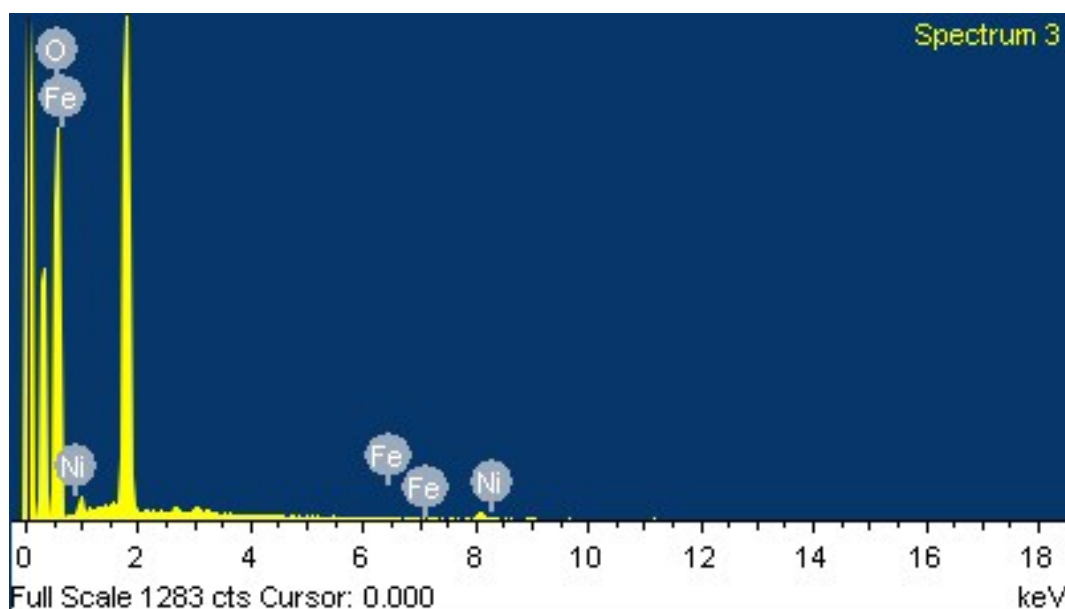

Fig. 1S EDAX of nano-NiFe<sub>2</sub>O<sub>4</sub>

### ESI 2.2.FESEM image of nano-NiFe<sub>2</sub>O<sub>4</sub>:

The field emission scanning electron microscope image of NiFe<sub>2</sub>O<sub>4</sub> also confirms the formation of spherical particles.

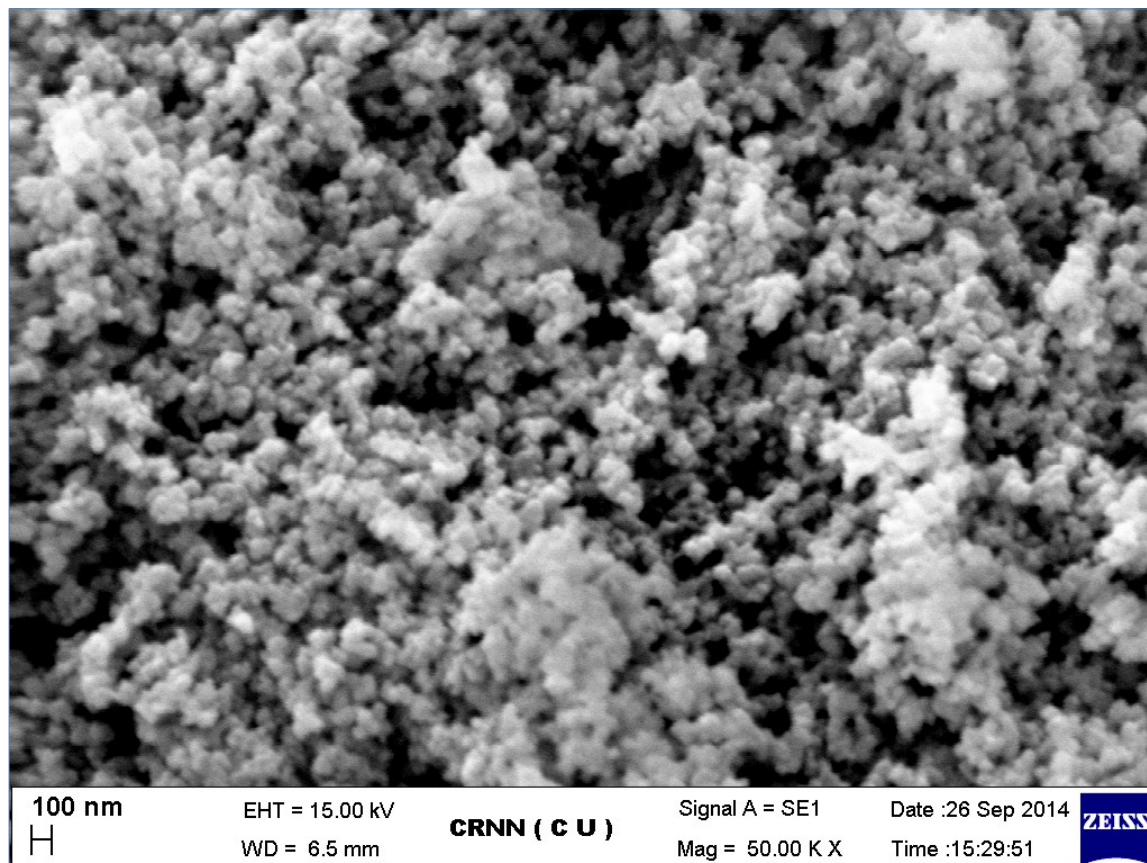

Fig. 2S FESEM image of nano-NiFe<sub>2</sub>O<sub>4</sub> :

### ESI 2.3.FTIR Spectra of nano-NiFe<sub>2</sub>O<sub>4</sub>:

An intrinsic stretching vibrations at 600 and 535 cm<sup>-1</sup> were assign for tetrahedral site of ferrite (Fe-O) and 817 cm<sup>-1</sup> for Fe-OH group were observed in FT-IR of nano-NiFe<sub>2</sub>O<sub>4</sub> (Fig. 5S).

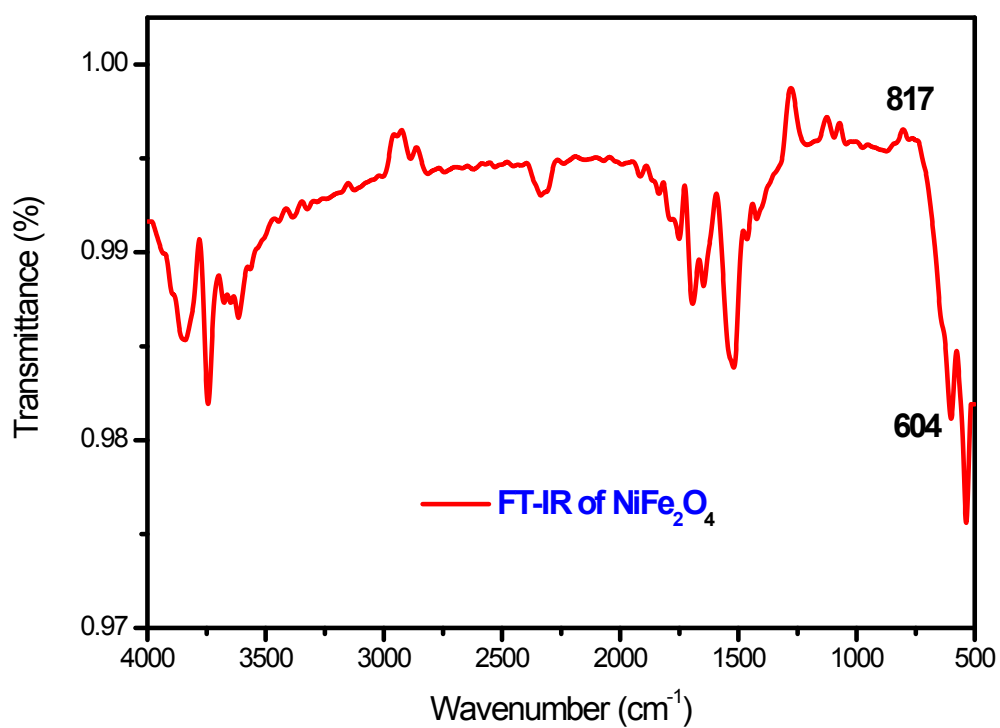

Fig. 3SFTIR Spectra of nano-NiFe<sub>2</sub>O<sub>4</sub>

### **ESI 3.Methods for the preparation of CuFe<sub>2</sub>O<sub>4</sub>:**

The preparation of CuFe<sub>2</sub>O<sub>4</sub> nanoparticles were carried out following reported procedure<sup>[3]</sup>. Solution of Cu(NO<sub>3</sub>)<sub>2</sub> (0.001 mol), and FeCl<sub>3</sub>·6H<sub>2</sub>O (0.002 mol) were prepared and vigorously mixed under stirring for 2 h at 80 °C. Subsequently, 0.3 M NaOH was added drop by drop into the solutions till the pH is reached upto 12 and black precipitate is formed. Then centrifuged and rinsed with distilled water and left in an atmosphere environment to dry. The resulting powder is then calcinated at 850° C in an oven for 2 hours.

### **ESI 4.Preparation of CoFe<sub>2</sub>O<sub>4</sub>**

The preparation of CoFe<sub>2</sub>O<sub>4</sub> nanoparticles were carried out following reported procedure<sup>[4]</sup>. First, 2.0 g of anhydrous sodium acetate was dissolved in 30 mL of ethylene glycol, and the mixture was stirred vigorously at room temperature to give a transparent solution. Subsequently, 1.5 mmol of cobalt hydrous chlorides (CoCl<sub>2</sub>·6H<sub>2</sub>O) and 3.0 mmol of ferric hydrous chloride (FeCl<sub>3</sub>·6H<sub>2</sub>O) was added slowly to the above solution (the stoichiometric molar ratio of Co<sup>2+</sup>/Fe<sup>3+</sup> was 1 : 2). This mixture was then vigorously stirred at 70°C for at least 2 h to form a homogeneous solution. Then centrifuged and rinsed with distilled water and left in an atmosphere environment to dry. The resulting powder is then calcinated at 850° C in an oven for 2 hours.

### **ESI 5. General Information:**

All reagents were obtained from commercial sources and used as received, except all solvents which were distilled prior to use. All reactions were carried out with oven-dried glassware under air and all the M.W. reactions were carried out in a sealed M.W. tube under closed air system. A monomode microwave reactor (CEM Discover 908005 Microwave Digestion System with Max. Microwave Power 300W, Volts 90/140 VAC, Freq. 50/60 Hz from CEM Corporation, USA) has been used for all the reactions. Technical grade petroleum ether and ethyl acetate were used for column chromatography. Analytical TLC was performed on Merck 60 F254 silica gel plates (0.25 mm thickness). Column chromatography was performed on silica gel (60-120 mesh size, HIMEDIA, India). <sup>1</sup>H NMR spectra were

determined on a Bruker 500, 400 and 300 MHz spectrometer as solutions in CDCl<sub>3</sub>. Chemical shifts are expressed in parts per million ( $\delta$ ) and the signals were reported as s (singlet), d (doublet), t (triplet), m (multiplet) and coupling constants  $J$  were given in Hz. <sup>13</sup>C NMR spectra were recorded at 125, 100 and 75 MHz in CDCl<sub>3</sub> solution. Chemical shifts are expressed in parts per million ( $\delta$ ) and are referenced to CDCl<sub>3</sub> ( $\delta$  = 77.16) as internal standard. All FT-IR was recorded on a BRUKER ALPHA spectrophotometer.

**ESI 6. General method for the synthesis of 2-alkoxy-3-arylimidazo[1,2-*a*]pyridines: Representative experimental procedure for the 2-ethoxy-3-phenylimidazo[1,2-*a*]pyridine:**

**(a) Conventional heating Condition:**

A mixture of  $\beta$ -nitrostyrene (1 mmol), 2-aminopyridine (1.3 mmol), ethanol (2 ml) and NiFe<sub>2</sub>O<sub>4</sub> (10 mol %) refluxed for 4 hours under open atmosphere. After completion of the reaction (monitored by TLC) the reaction mixture was cooled to room temperature and extracted with ethyl acetate, washed with water with Brine solution. The organic phase was dried over anhydrous Na<sub>2</sub>SO<sub>4</sub>. The crude product was obtained by evaporation of solvent in vacuum which was purified by column chromatography over silica gel (60–120 mesh) using mixture of petroleum ether and ethyl acetate (9:1) as an eluting solvent to afford the pure product.

**(b) MW irradiation Conditions:**

A mixture of  $\beta$ -nitrostyrene (1 mmol), 2-aminopyridine (1.3 mmol) and ethanol (2 ml) was taken in a sealed MW tube with a magnetic bar in presence of NiFe<sub>2</sub>O<sub>4</sub> (10 mol %) and was irradiated at under MW condition (70 W) for 5 minutes. After that, the mixture was cooled to room temperature and the catalyst separated by a strong external magnet and finally, product was extracted with ethyl acetate, washed with water with Brine solution. The organic phase was dried over anhydrous Na<sub>2</sub>SO<sub>4</sub>. The crude product was obtained by evaporation of solvent in vacuum which was purified by column chromatography over silica gel (60–120 mesh) using mixture of petroleum ether and ethyl acetate (9:1) as an eluting solvent to afford pure 2-ethoxy-3-phenylimidazo[1,2-*a*]pyridine. This protocol was followed for all the products listed in Table 2. The products were confirmed by FT-IR, <sup>1</sup>H NMR and <sup>13</sup>C NMR spectroscopy and elemental analysis. The spectroscopic data and elemental analysis of all the compounds has been given in S7.

## ESI 7. Detailed spectral data of the 2-alkoxy-imidazopyridine derivatives listed in Table 2.

The  $^1\text{H}$  and  $^{13}\text{C}$  NMR spectra were recorded 300 MHz, 400 MHz or 500 MHz Bruker NMR spectrometer and  $\text{CDCl}_3$  was used as solvent.

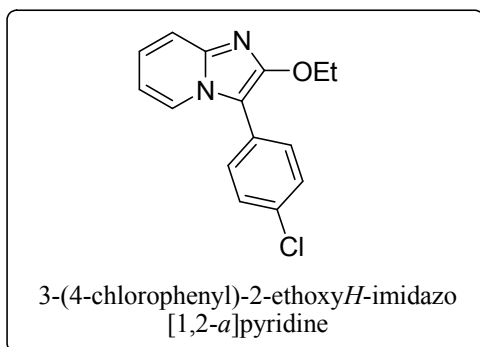

Gummy mass (entry 1, Table 2, Isolated yield 85%);  $^1\text{H}$  NMR (300MHz,  $\text{CDCl}_3$ ):  $\delta$  8.31 (d,  $J = 3.0$  Hz, 1H), 7.32-7.27 (m, 4H), 7.23 (t,  $J = 3.0$  Hz, 1H), 6.88 (t,  $J = 3.0$  Hz, 1H), 6.56 (d,  $J = 3.0$  Hz), 4.50-4.43 (m, 2H), 1.45 (t,  $J = 7.2$  Hz, 3H);  $^{13}\text{C}$  NMR (75MHz,  $\text{CDCl}_3$ ):  $\delta$  161.38, 161.02, 148.87, 137.69, 131.69, 131.64, 130.27, 129.21, 128.10, 118.22, 116.48, 63.08, 14.37; Anal calc for  $\text{C}_{17}\text{H}_{17}\text{ClN}_2\text{O}$ : C, 66.06; H, 4.80; N, 10.27 %; Found: C, 66.01; H, 4.85; N, 10.30 %.

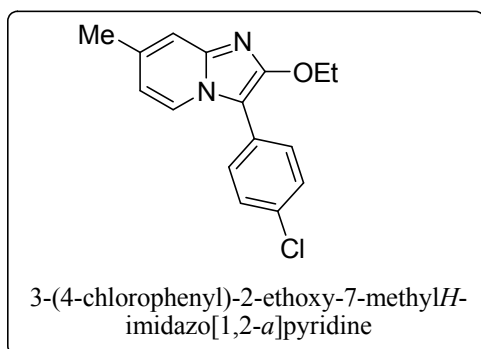

Gummy mass (entry 2, Table 2, Isolated yield 80%);  $^1\text{H}$  NMR (300MHz,  $\text{CDCl}_3$ ):  $\delta$  8.15 (d,  $J = 5.1$  Hz, 1H), 7.18 (d,  $J = 6.3$  Hz, 2H), 7.27 (d,  $J = 6.3$  Hz, 2H), 6.73 (d,  $J = 5.1$  Hz, 1H), 6.44 (s, 1H), 4.43 (q,  $J = 6.9$  Hz, 2H), 2.22 (s, 3H), 1.43 (t,  $J = 6.9$  Hz, 3H);  $^{13}\text{C}$  NMR (75MHz,  $\text{CDCl}_3$ ):  $\delta$  161.02, 149.16, 148.59, 139.65, 138.01, 136.40, 130.66, 130.17, 128.41, 119.77, 116.78, 63.16, 21.09, 14.37; Anal calc for  $\text{C}_{16}\text{H}_{15}\text{ClN}_2\text{O}$ : C, 67.02; H, 5.27; N, 9.75 %; Found: C, 66.91; H, 5.30; N, 9.79 %.

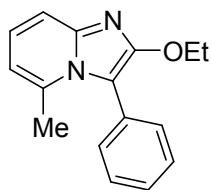

2-ethoxy-5-methyl-3-phenyl*H*-imidazo  
[1,2-*a*]pyridine

Gummy mass (entry 3, Table 2, Isolated yield 85%); <sup>1</sup>H NMR (300MHz, CDCl<sub>3</sub>): δ 7.32-7.25 (m, 4H), 7.21-7.16 (m, 2H), 6.73 (d, *J* = 6.0 Hz 1H), 6.25 (d, *J* = 8.1 Hz 1H), 4.48-4.41 (m, 2H), 2.45 (s, 3H), 1.41 (t, *J* = 6.9 Hz, 3H); <sup>13</sup>C NMR (75MHz, CDCl<sub>3</sub>): δ 160.86, 160.81, 157.72, 137.90, 131.66, 130.21, 129.23, 128.01, 117.50, 113.09, 62.98, 24.48, 14.36. Anal calc for C<sub>16</sub>H<sub>16</sub>N<sub>2</sub>O: C, 76.16; H, 6.39; N, 11.10 %; Found: C, 76.12; H, 6.43; N, 11.16 %.

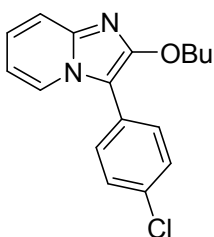

2-butoxy-3-(4-chlorophenyl)*H*-imidazo  
[1,2-*a*]pyridine

Gummy mass (Table 2, entry 4, yield 84%); <sup>1</sup>H NMR (400MHz, CDCl<sub>3</sub>): δ 8.31 (d, *J* = 4.8Hz, 1H), 7.53-7.49 (m, 1H), 7.26-7.18 (m, 4H), 6.92 (t, *J* = 5.2 Hz, 1H), 4.41-4.10 (t, *J* = 6.4 Hz, 2H), 1.82-1.76 (m, 2H), 1.53-1.47 (m, 2H), 1.00-0.97 (t, *J* = 7.2 Hz, 3H); <sup>13</sup>C NMR (100MHz, CDCl<sub>3</sub>): δ 161.31, 157.75, 148.82, 138.60, 137.67, 134.40, 132.31, 129.17, 128.10, 118.20, 116.47, 67.44, 30.85, 21.17, 14.45. Anal calc for C<sub>17</sub>H<sub>17</sub>ClN<sub>2</sub>O: C, 67.88; H, 5.70; N, 9.31 %; Found: C, 67.3; H, 5.75; N, 9.27 %.

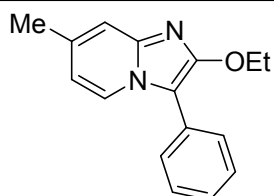

2-ethoxy-7-methyl-3-phenyl*H*-imidazo  
[1,2-*a*]pyridine

Gummy mass (Table 2, entry 5, Isolated yield- 85%); <sup>1</sup>H NMR (500MHz, CDCl<sub>3</sub>): δ 8.16 (d, *J* = 5.0 Hz, 1H), 7.33-7.26 (m, 3 H), 7.23-7.20 (m, 2H), 6.71-6.70 (d, *J* = 5.0 Hz 1H), 6.412 (s, 1H), 4.47-4.43 (m, 2H), 2.20(s, 1H), 1.45-1.43 (t, *J* = 7.0 Hz, 3H); <sup>13</sup>C NMR (125MHz, CDCl<sub>3</sub>): δ 161.25, 160.70, 149.04, 148.30, 131.78, 130.25, 129.22, 128.94, 127.36, 119.53, 116.92, 63.03, 21.04, 14.39. Anal calc for C<sub>16</sub>H<sub>16</sub>N<sub>2</sub>O:

C, 76.16; H, 6.39; N, 11.10 %; Found: C, 76.12; H, 6.44; N, 11.16 %.

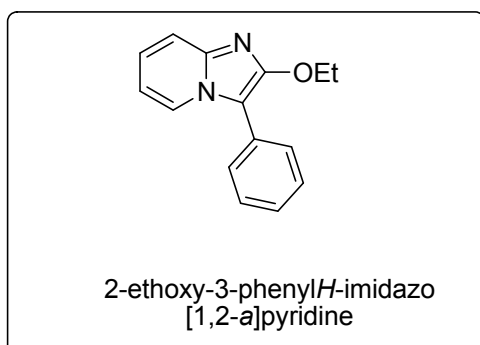

Gummy mass (Table 2, entry 6, Isolated yield- 85%);

<sup>1</sup>H NMR (500MHz, CDCl<sub>3</sub>): δ 8.33 (d, *J* = 4.0 Hz, 1H), 7.47 (t, *J* = 6.0 Hz, 1 H), 7.33-7.21 (m, 5H), 6.89 (d, *J* = 5.0 Hz, 1H), 6.56 (d, *J* = 8.0 Hz, 1H), 4.50-4.46 (m, 2H), 1.27 (t, *J* = 7.5 Hz, 3H); <sup>13</sup>C NMR (75MHz, CDCl<sub>3</sub>): δ 161.37, 160.98, 148.86, 147.92, 131.67, 130.26, 129.19, 128.90, 127.37, 120.00, 116.46, 63.06, 14.35. Anal calc for C<sub>15</sub>H<sub>14</sub>N<sub>2</sub>O: C, 75.65; H, 6.92; N, 11.76 %; Found: C, 75.60; H, 5.95; N, 11.82 %.

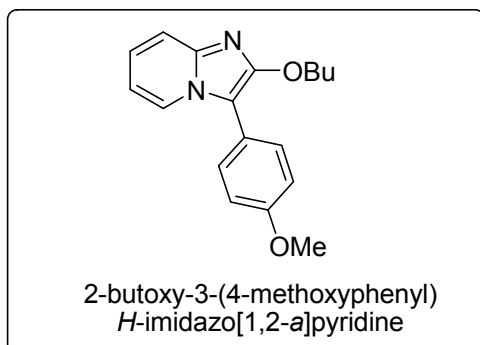

Gummy mass (Table 2, entry 7, Isolated yield-

84%); <sup>1</sup>H NMR (500MHz, CDCl<sub>3</sub>): δ 8.34 (d, *J* = 4.0 Hz, 1H), 7.49 (t, *J* = 8.0 Hz, 1H), 7.26 (t, *J* = 4.5 Hz, 1H), 6.89 (d, *J* = 5.5 Hz 1H), 6.72 (d, *J* = 8.5 Hz, 1H), 6.57 (d, *J* = 8.0 Hz 1H), 4.38 (t, *J* = 6.5 Hz, 2H), 1.84-1.78(m, 2H), 1.55-1.49 (m, 2H), 1.007-0.978 (t, 3H); <sup>13</sup>C NMR (125MHz, CDCl<sub>3</sub>): δ 165.95, 161.31, 148.56, 144.79, 137.73, 133.67, 130.61, 128.55, 128.49, 118.48, 118.43, 116.57, 67.48, 30.80, 21.16, 19.61. Anal calc for C<sub>18</sub>H<sub>20</sub>N<sub>2</sub>O<sub>2</sub>: C, 72.95; H, 6.80; N, 9.45 %; Found: C, 72.91; H, 6.77; N, 9.40 %.

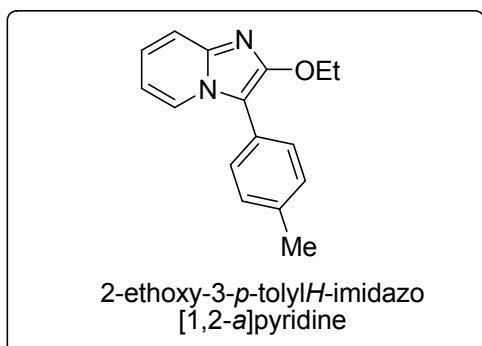

Gummy mass (Table 2, entry 8, Isolated yield- 86%); <sup>1</sup>H NMR (500MHz, CDCl<sub>3</sub>): δ 8.17 (d, *J* = 5.0

Hz, 1H), 7.28 (t,  $J = 8.0$  Hz, 2H), 7.2 (d,  $J = 8.0$  Hz, 1H), 7.00 (d,  $J = 8.0$  Hz, 1H), 6.88 (d,  $J = 5.0$  Hz, 1H), 6.71 (d,  $J = 5.0$  Hz, 1H), 4.447-4.404 (m, 2H), 2.25 (s, 3H), 1.42 (t,  $J = 7.0$  Hz, 3H);  $^{13}\text{C}$  NMR (125 MHz,  $\text{CDCl}_3$ ):  $\delta$  161.28, 149.16, 148.57, 138.46, 138.01, 135.19, 131.61, 130.28, 128.56, 119.33, 116.68, 63.66, 21.13, 14.21. Anal. calc. for  $\text{C}_{16}\text{H}_{16}\text{N}_2\text{O}$ : C, 76.16; H, 6.39; N, 11.10 %; Found: C, 76.12; H, 6.44; N, 11.06 %.

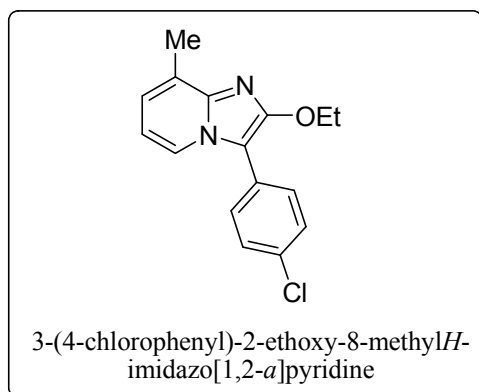

Gummy mass (Table 2, entry 9, Isolated yield- 81%);  $^1\text{H}$  NMR (500 MHz,  $\text{CDCl}_3$ ):  $\delta$  7.99 (d,  $J = 6.5$  Hz, 1H), 7.91 (d,  $J = 8.5$  Hz, 2H), 7.40 (d,  $J = 8.5$  Hz, 2H), 6.96 (d,  $J = 6.5$  Hz, 1H), 6.70 (t,  $J = 6.5$  Hz, 1H), 4.15-4.11 (m, 2H), 2.67 (s, 3H), 1.27 (t,  $J = 9.0$  Hz, 3H);  $^{13}\text{C}$  NMR (125 MHz,  $\text{CDCl}_3$ ):  $\delta$  161.17, 149.29, 148.55, 139.21, 137.82, 135.90, 130.68, 130.07, 128.63, 119.17, 116.66, 63.93, 21.01, 14.67; Anal. calc. for  $\text{C}_{16}\text{H}_{15}\text{ClN}_2\text{O}$ : C, 67.02; H, 5.27; N, 9.77 %; Found: C, 66.93; H, 5.23; N, 9.80 %.

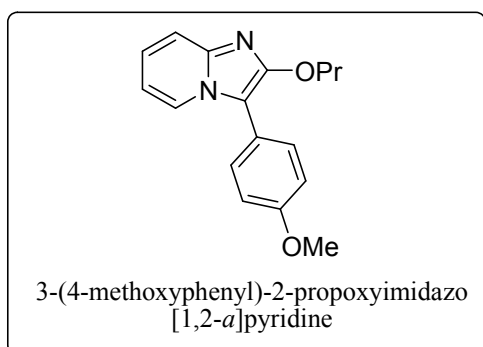

Gummy mass (Table 2, entry 10, Isolated yield- 80%);  $^1\text{H}$  NMR (500 MHz,  $\text{CDCl}_3$ ):  $\delta$  8.30 (d,  $J = 6.5$  Hz, 1H), 7.48 (t,  $J = 6.5$  Hz, 1H), 7.25 (d,  $J = 8.5$  Hz, 1H), 6.92 (d,  $J = 6.5$  Hz, 2H), 6.74 (d,  $J = 6.5$  Hz, 2H), 6.55 (d,  $J = 6.5$  Hz, 1H), 4.41-4.35 (m, 2H), 3.76 (s, 3H), 1.85-1.67 (m, 2H), 1.00 (t,  $J = 9.0$  Hz, 3H);  $^{13}\text{C}$  NMR (125 MHz,  $\text{CDCl}_3$ ):  $\delta$  171.28, 148.77, 142.06, 137.89, 136.91, 131.12, 129.11, 128.41, 118.06, 116.53, 113.48, 67.04, 60.51, 21.15, 14.30. Anal. calc. for  $\text{C}_{16}\text{H}_{15}\text{ClN}_2\text{O}$ : C, 72.32; H, 6.43; N, 9.92 %; Found: C, 72.29; H, 6.46; N, 9.96 %.

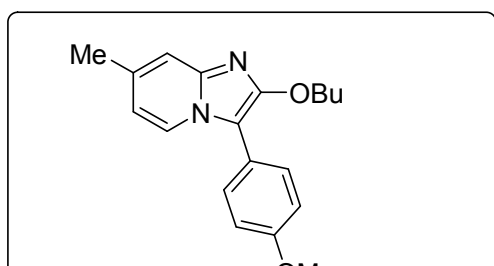

Gummy mass (Table 2, entry 11, Isolated yield- 86%);  $^1\text{H}$  NMR (300 MHz,  $\text{CDCl}_3$ ):  $\delta$  8.38 (d,  $J = 5.1$

Hz, 1H), 7.65 (d,  $J$  = 6.3 Hz, 2H), 7.58 (d,  $J$  = 6.3 Hz, 2H), 6.68 (d,  $J$  = 5.1 Hz, 1H), 6.46 (s, 1H), 4.46 (q,  $J$  = 6.9 Hz, 2H), 3.85 (s, 3H), 2.31 (s, 3H), 1.76 (m, 2H), 1.5 (m, 1H), 0.91 (t, 3H);  $^{13}\text{C}$  NMR (75MHz,  $\text{CDCl}_3$ ):  $\delta$  161.15, 148.07, 147.17, 131.14, 129.13, 125.14, 119.43, 118.13, 113.50, 62.95, 55.39, 55.38, 29.84, 21.17, 14.43; Analcalc for  $\text{C}_{19}\text{H}_{22}\text{N}_2\text{O}_2$ : C, 73.52; H, 7.14; N, 9.03 %; Found: C, 73.44; H, 7.19; N, 9.09 %.

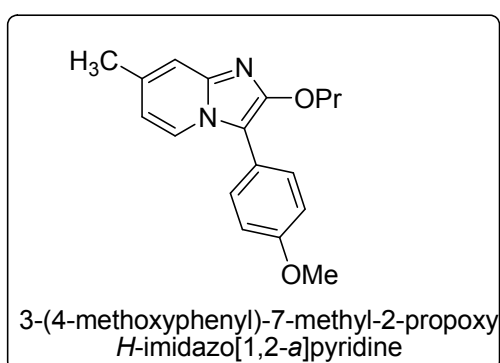

Gummy mass (Table 2, entry 12, Isolated yield- 83%);  $^1\text{H}$  NMR (300MHz,  $\text{CDCl}_3$ ):  $\delta$  8.18 (d,  $J$  = 4.2 Hz, 1H), 7.30 (d,  $J$  = 4.8 Hz, 2H), 7.25 (d,  $J$  = 4.8 Hz, 2H), 6.69 (d,  $J$  = 5.1 Hz, 1H), 6.46 (s, 1H), 4.43 (q,  $J$  = 7.2 Hz, 2H), 3.75 (s, 3H), 2.23 (s, 3H), 1.71 (m, 2H), 0.89 (t,  $J$  = 6.6 Hz, 3H);  $^{13}\text{C}$  NMR (75MHz,  $\text{CDCl}_3$ ):  $\delta$  160.98, 148.86, 147.92, 131.64, 130.23, 129.19, 128.92, 128.08, 120.01, 116.43, 60.54, 30.85, 21.18, 19.11, 14.34; Analcalc for  $\text{C}_{18}\text{H}_{20}\text{N}_2\text{O}_2$ : C, 72.95; H, 6.80; N, 9.45 %; Found: C, 72.91; H, 6.76; N, 9.49.

**ESI 8. Copy of  $^1\text{H}$  NMR and  $^{13}\text{C}$  NMR spectra of all compounds:**

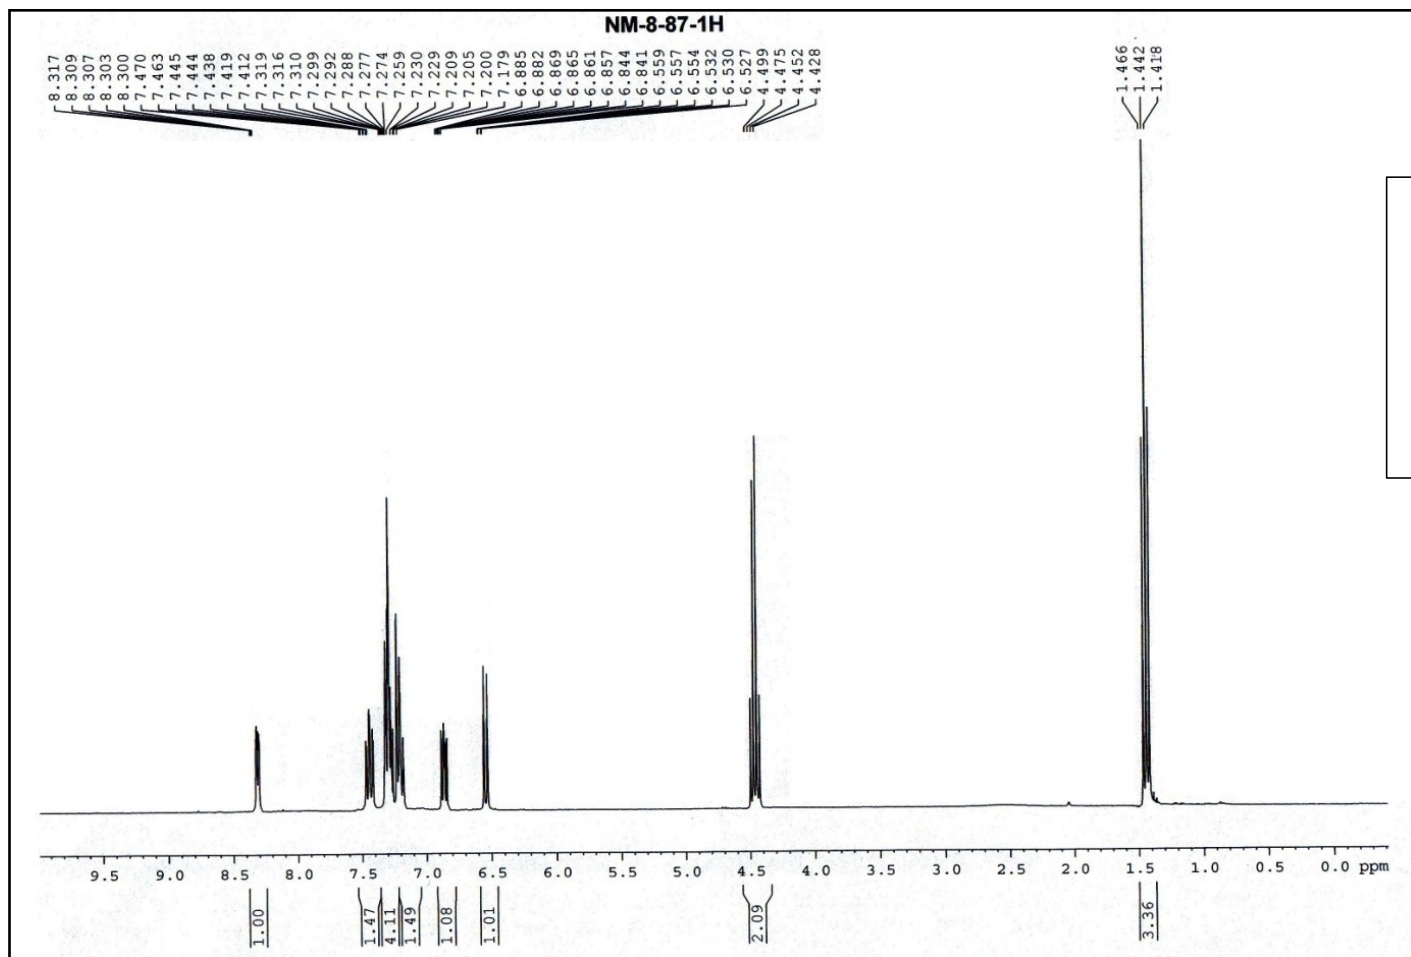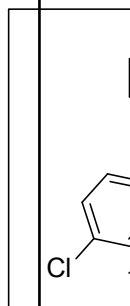

NM-S-87-13C

161.38  
161.02  
148.87  
137.69  
131.69  
130.27  
129.21  
128.10  
118.22  
116.48

77.58  
77.16  
76.74  
63.08

14.37

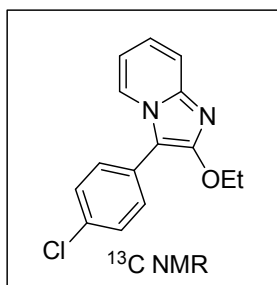

Current Data Parameters  
NAME NM-S-87-13C  
EXPNO 1  
PROCNO 1

F2 - Acquisition Parameters  
Date\_ 20150302  
Time\_ 15.40  
INSTRUM spect  
PROBHD 5 mm PABBO BB-  
PULPROG zgpg30  
TD 32768  
SOLVENT CDCl3  
NS 49  
DS 4  
SWH 22727.273 Hz  
FIDRES 0.693581 Hz  
AQ 0.7208960 sec  
RG 210.78  
DW 22.000 usec  
DE 6.50 usec  
TE 300.0 K  
D1 2.00000000 sec  
D11 0.03000000 sec  
TD0 1

===== CHANNEL f1 =====  
SFO1 75.4752949 MHz  
NUC1 13C  
P1 9.25 usec  
PLW1 34.00000000 W

===== CHANNEL f2 =====  
SFO2 300.1312005 MHz  
NUC2 1H  
CPDPRG[2] waltz16  
PCPD2 90.00 usec  
PLW2 6.99840021 W  
PLW12 0.17545000 W  
PLW13 0.14211001 W

F2 - Processing parameters  
SI 32768  
SF 75.4677402 MHz  
WDW EM  
SSB 0  
LB 1.00 Hz  
GB 0  
PC 1.40

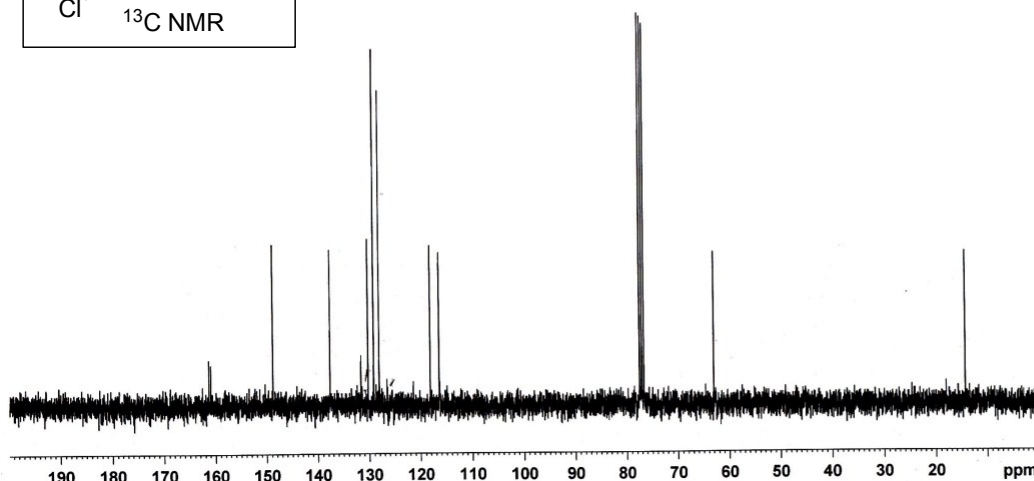

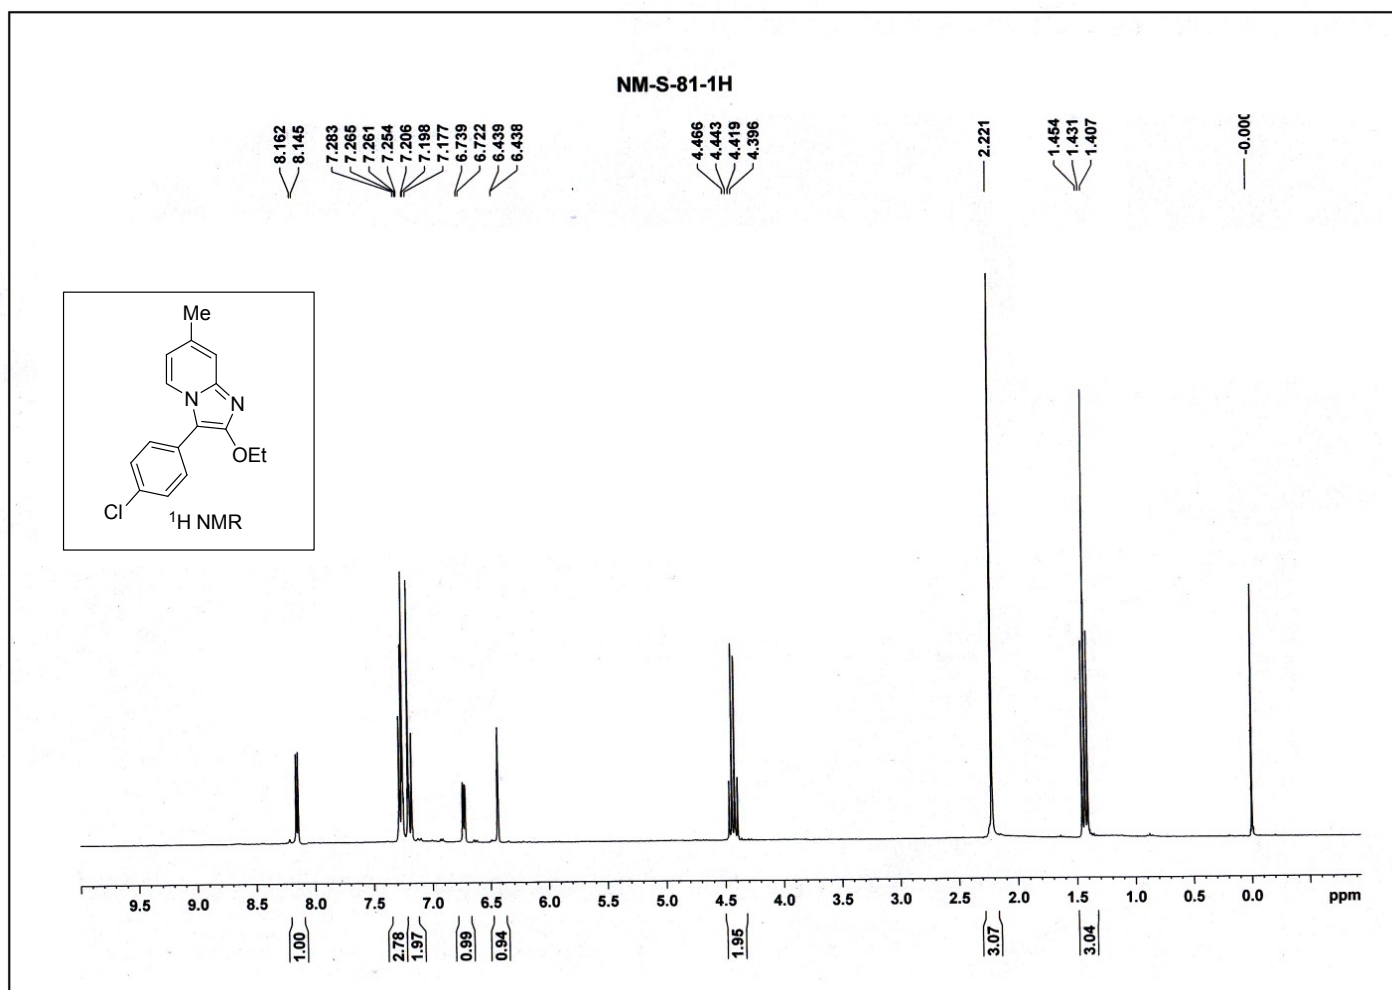

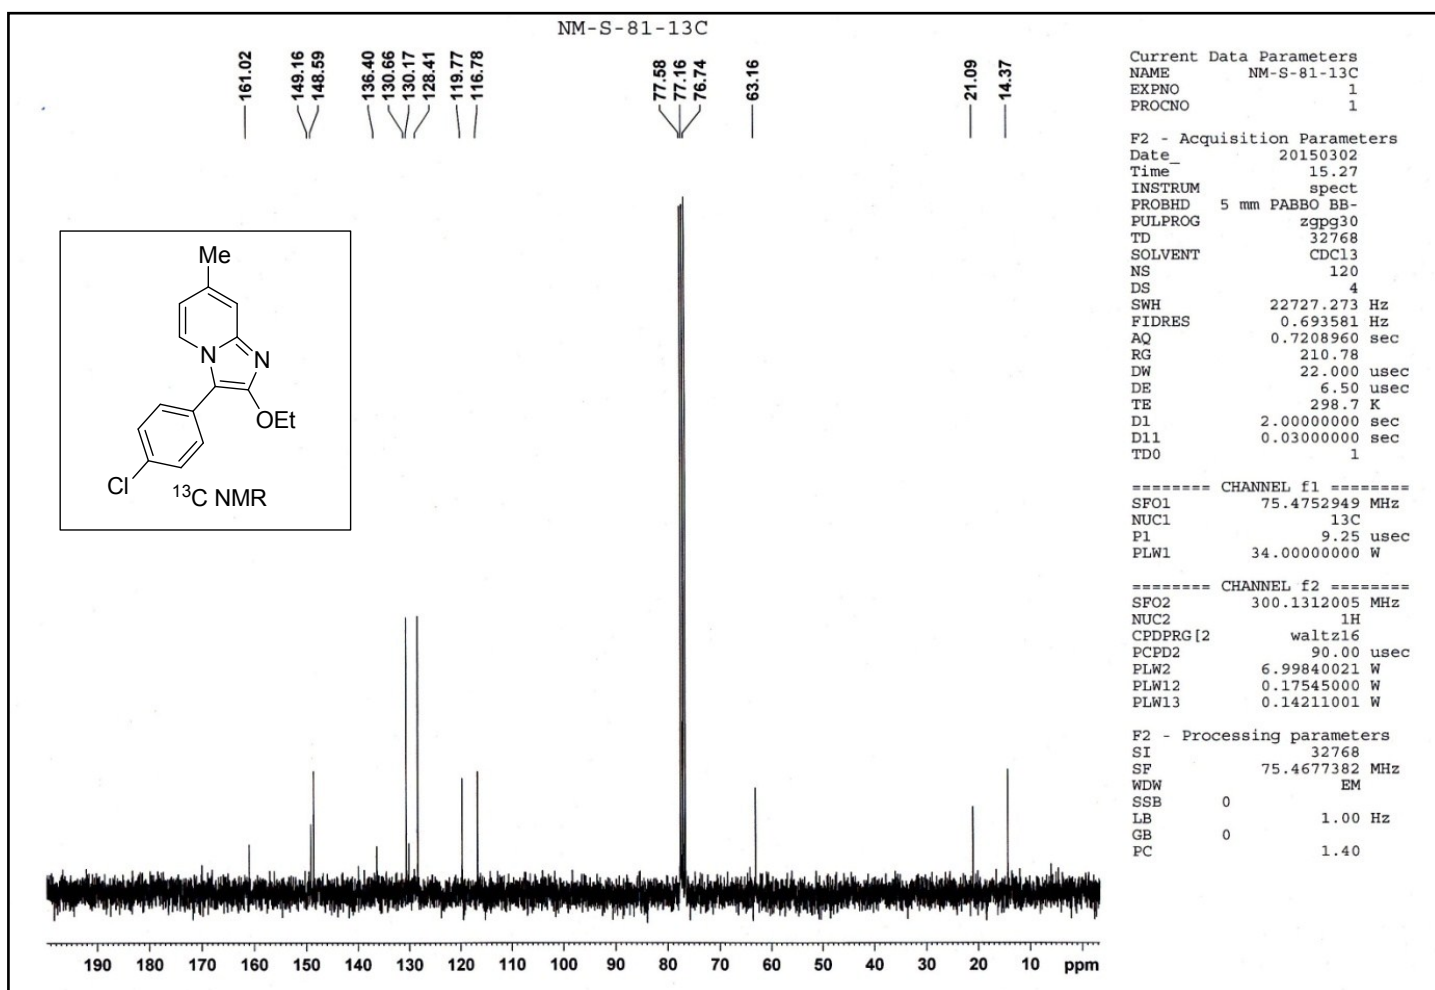

NM-S-86-1H

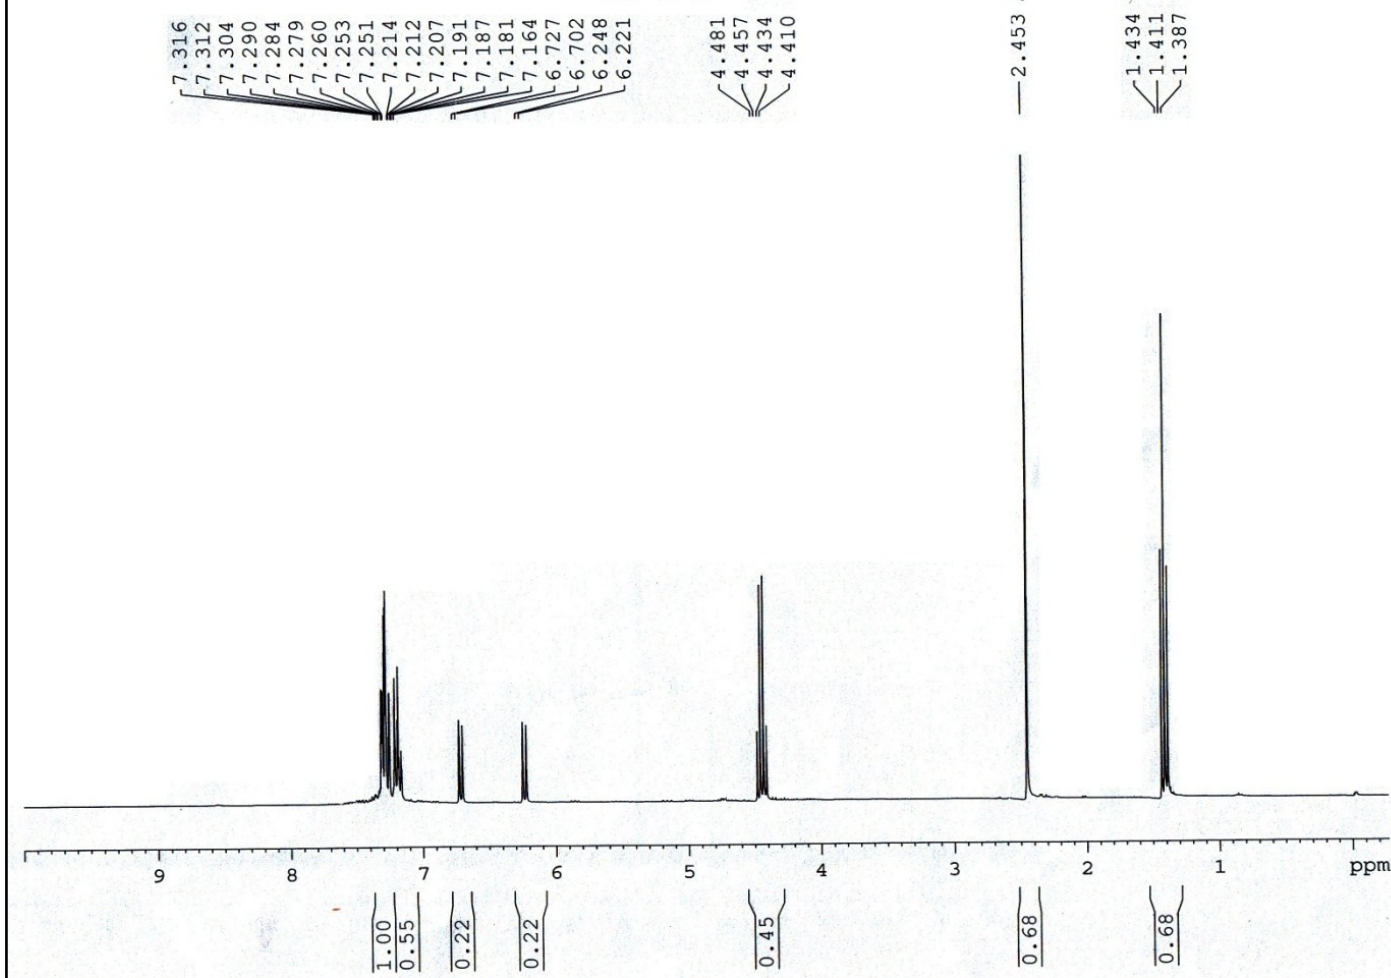

NM-S-86-13C

160.86  
160.81  
157.72

137.90  
131.66  
130.21  
129.23  
128.01

117.50  
113.09

77.59  
77.16  
76.74

62.98

24.48

14.36

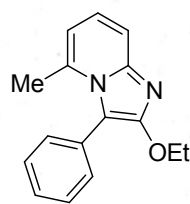

<sup>13</sup>C NMR

Current Data Parameters  
NAME NM-S-86-13C  
EXPNO 1  
PROCNO 1

F2 - Acquisition Parameters  
Date\_ 20150302  
Time 15.12  
INSTRUM spect  
PROBHD 5 mm PABBO BB-  
PULPROG zgpg30  
TD 32768  
SOLVENT CDCl3  
NS 63  
DS 4  
SWH 22727.273 Hz  
FIDRES 0.693581 Hz  
AQ 0.7208960 sec  
RG 210.78  
DW 22.000 usec  
DE 6.50 usec  
TE 298.7 K  
D1 2.00000000 sec  
D11 0.03000000 sec  
TDO 1

===== CHANNEL f1 =====  
SFO1 75.4752949 MHz  
NUC1 13C  
P1 9.25 usec  
PLW1 34.00000000 W

===== CHANNEL f2 =====  
SFO2 300.1312005 MHz  
NUC2 1H  
CPDPRG[2] waltz16  
PCPD2 90.00 usec  
PLW2 6.99840021 W  
PLW12 0.17545000 W  
PLW13 0.14211001 W

F2 - Processing parameters  
SI 32768  
SF 75.4677418 MHz  
WDW EM  
SSB 0  
LB 1.00 Hz  
GB 0  
PC 1.40

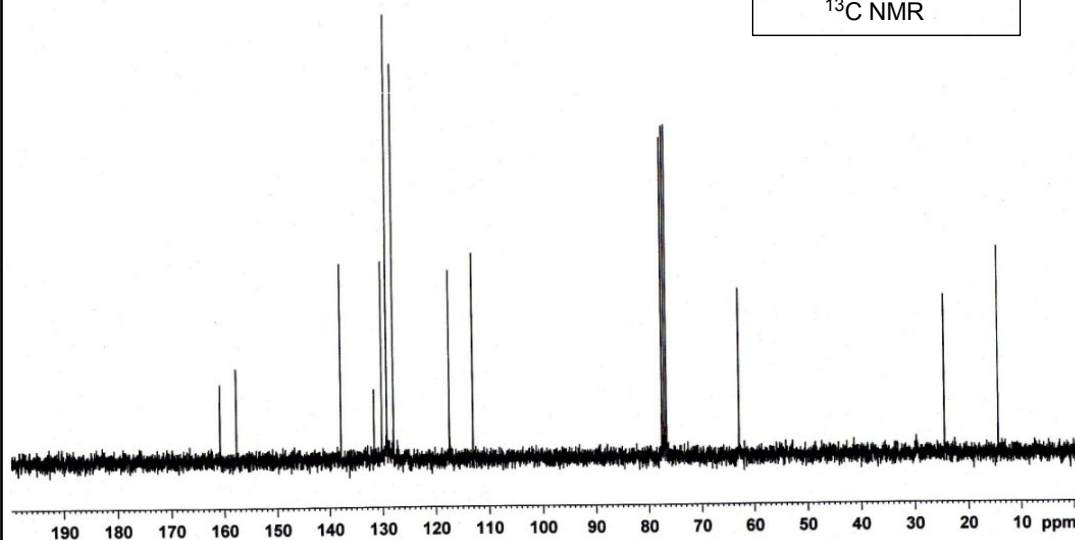

NM-S-94-1H (ND) 400MHz.

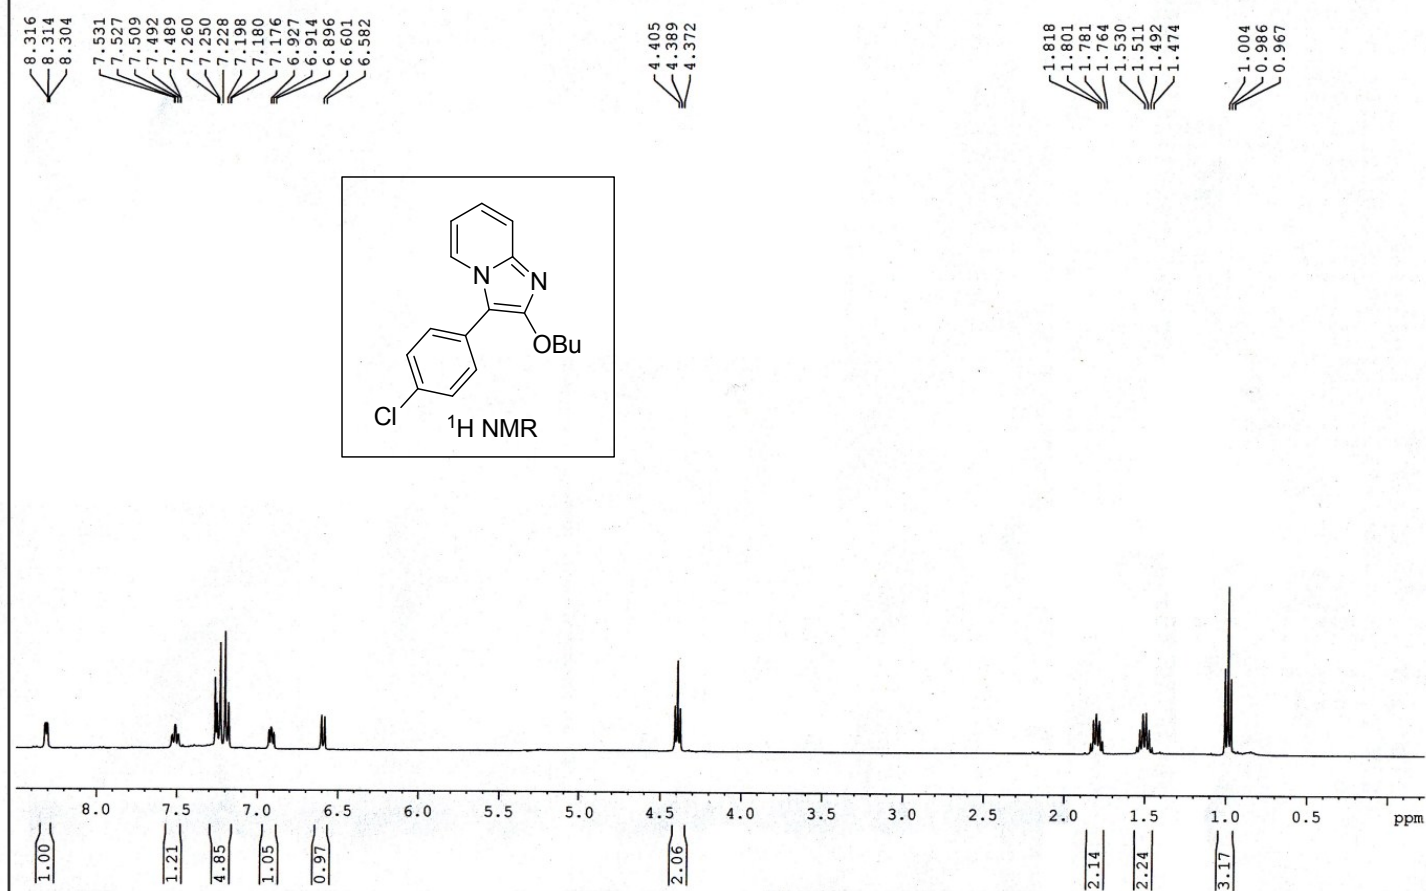

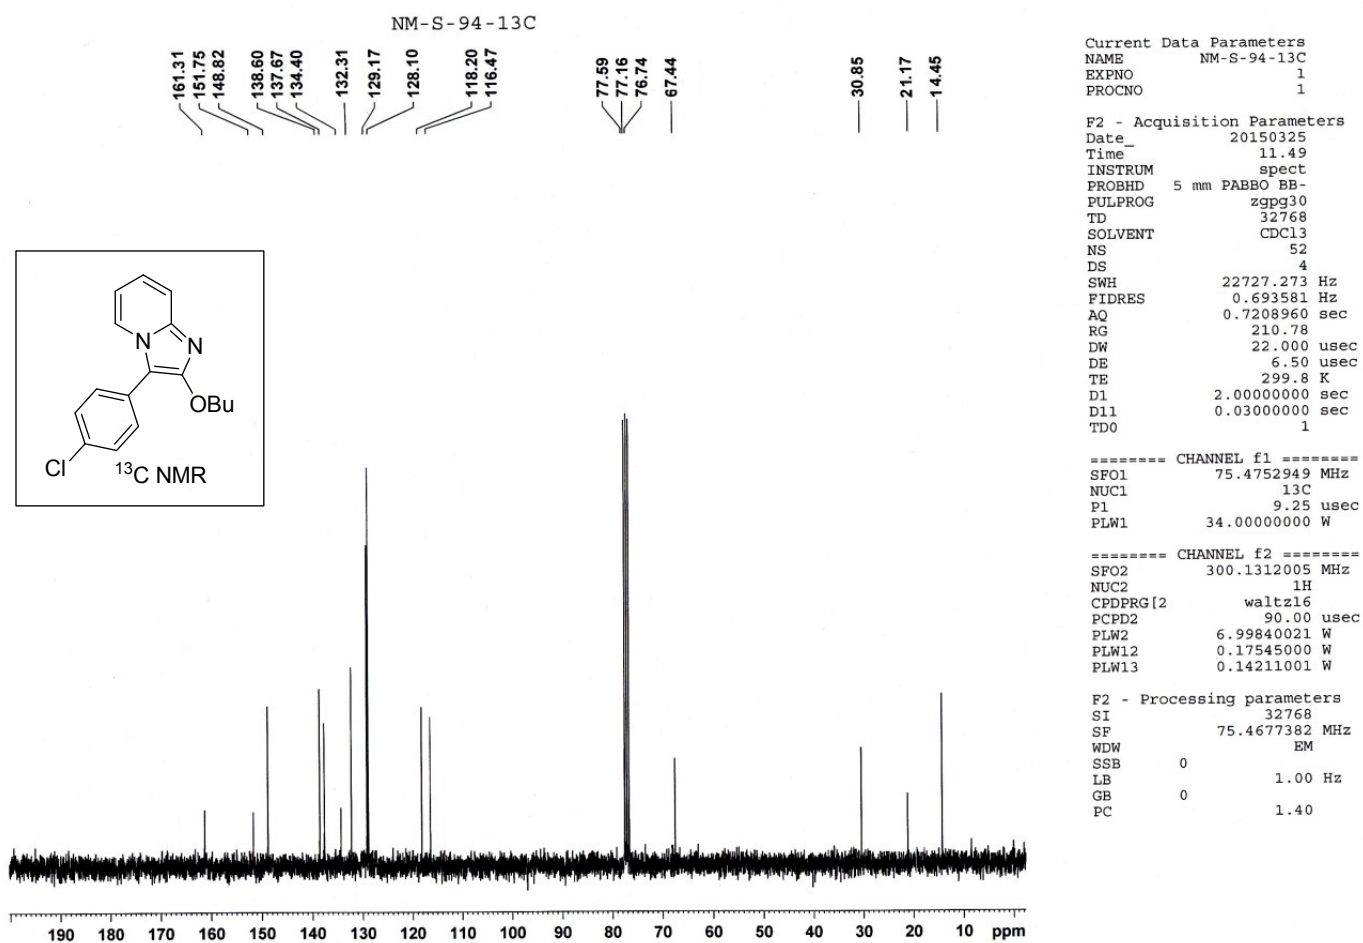

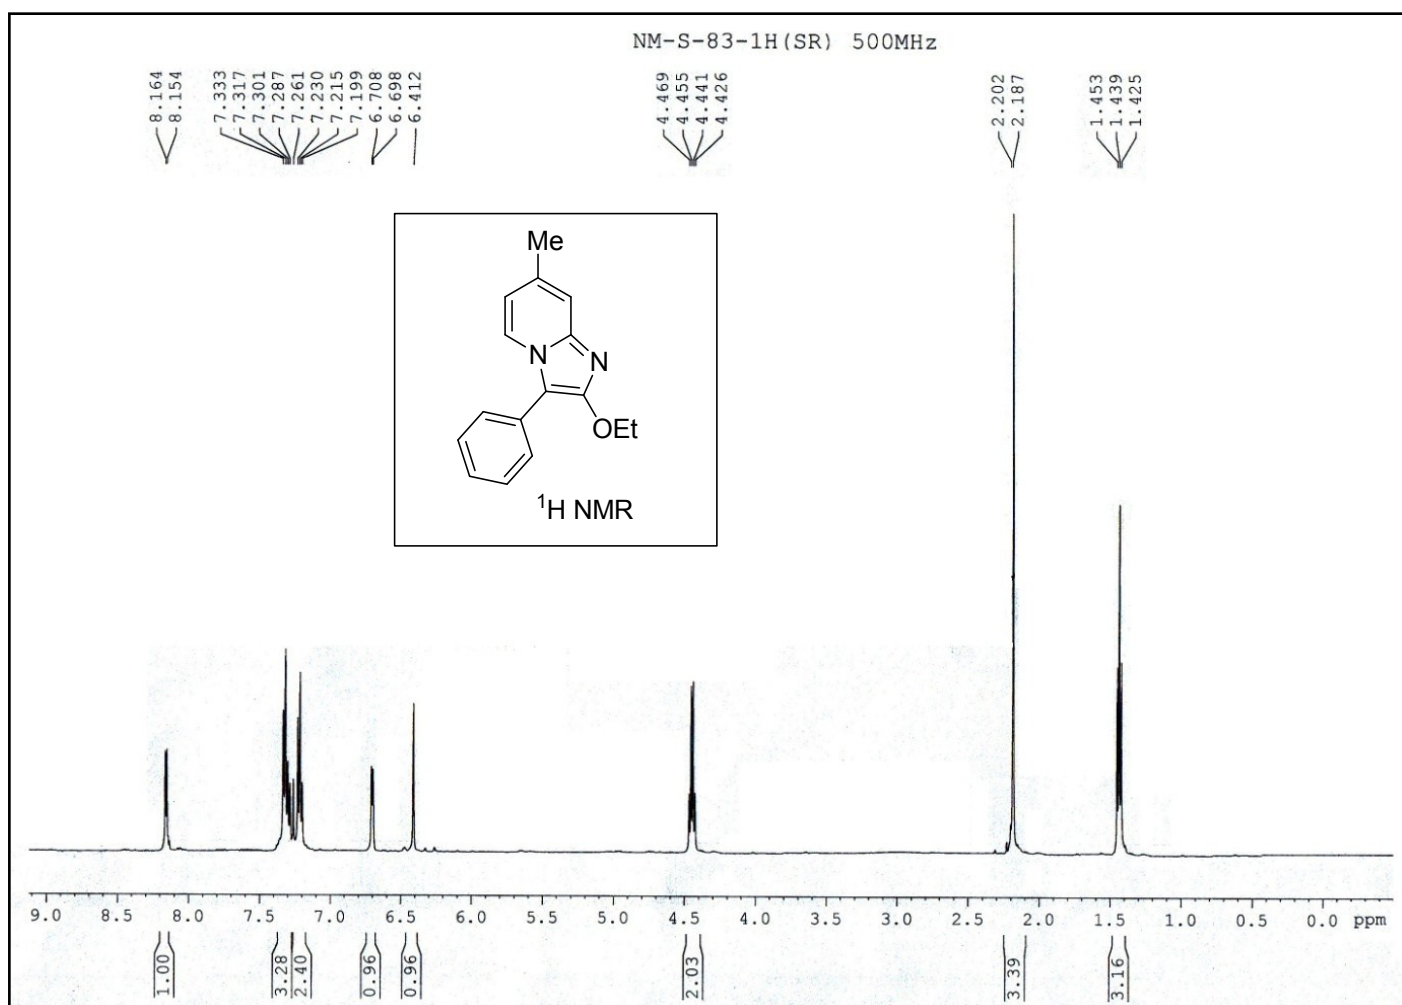

NM-S-83-13C-240315-7- (ND)

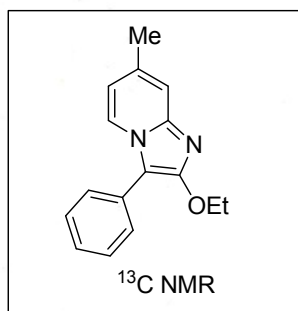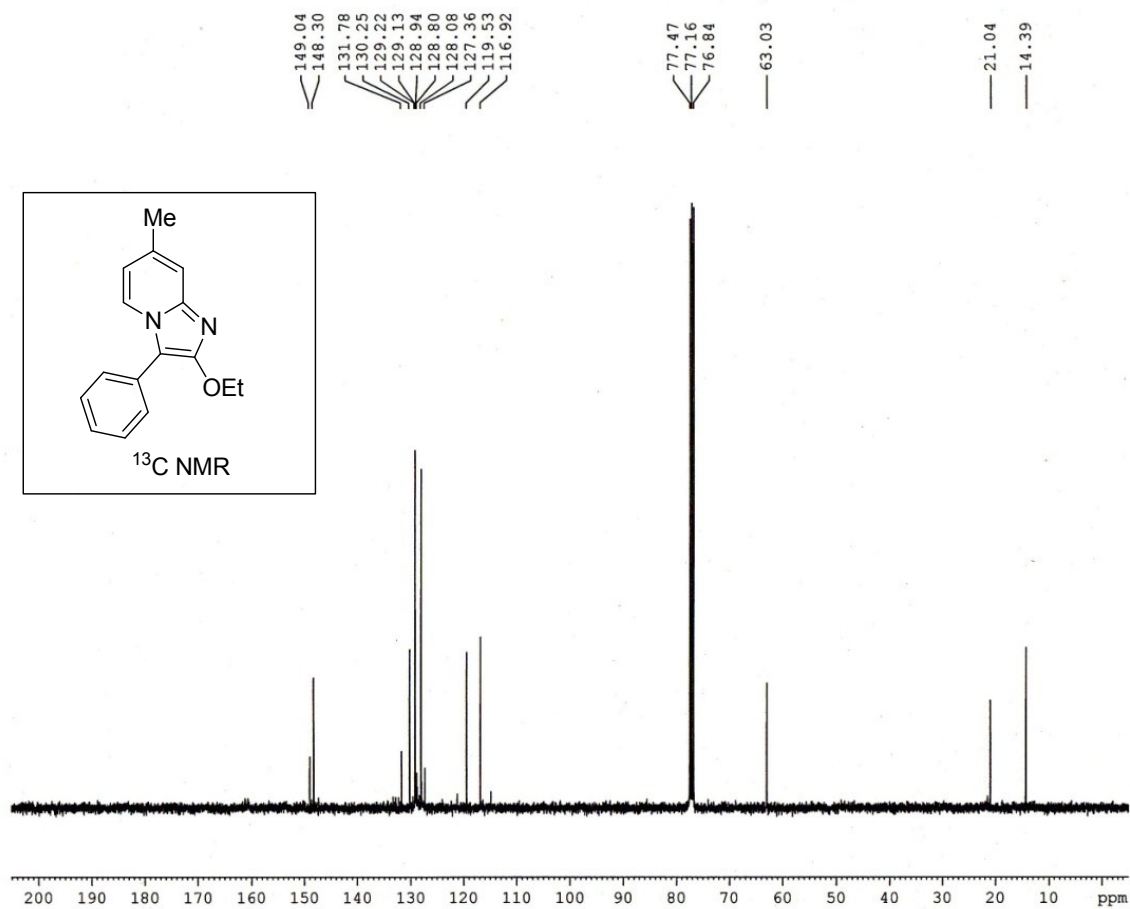

Current Data Parameters  
NAME Mar24-2015  
EXPNO 7  
PROCNO 1

F2 - Acquisition Parameters  
Date 20150325  
Time 10.53  
INSTRUM spect  
PROBHD 5 mm PABBO BB/  
PULPROG zgpg30  
TD 32768  
SOLVENT CDCl3  
NS 421  
DS 4  
SWH 24038.461 Hz  
FIDRES 0.733596 Hz  
AQ 0.6815744 sec  
RG 203  
DW 20.800 usec  
DE 6.50 usec  
TE 0 K  
D1 2.00000000 sec  
D11 0.03000000 sec  
TD0 1

===== CHANNEL f1 =====  
SFO1 100.6404326 MHz  
NUC1 13C  
P1 9.00 usec  
PLW1 55.00000000 W

===== CHANNEL f2 =====  
SFO2 400.2016008 MHz  
NUC2 1H  
CPDPRG2 waltz16  
PCPD2 90.00 usec  
PLW2 10.00000000 W  
PLW12 0.29660001 W  
PLW13 0.24025001 W

F2 - Processing parameters  
SI 32768  
SF 100.6303569 MHz  
WDW EM  
SSB 0  
LB 1.00 Hz  
GB 0  
PC 1.40

SJ-S-119-1H(SR) 500MHz

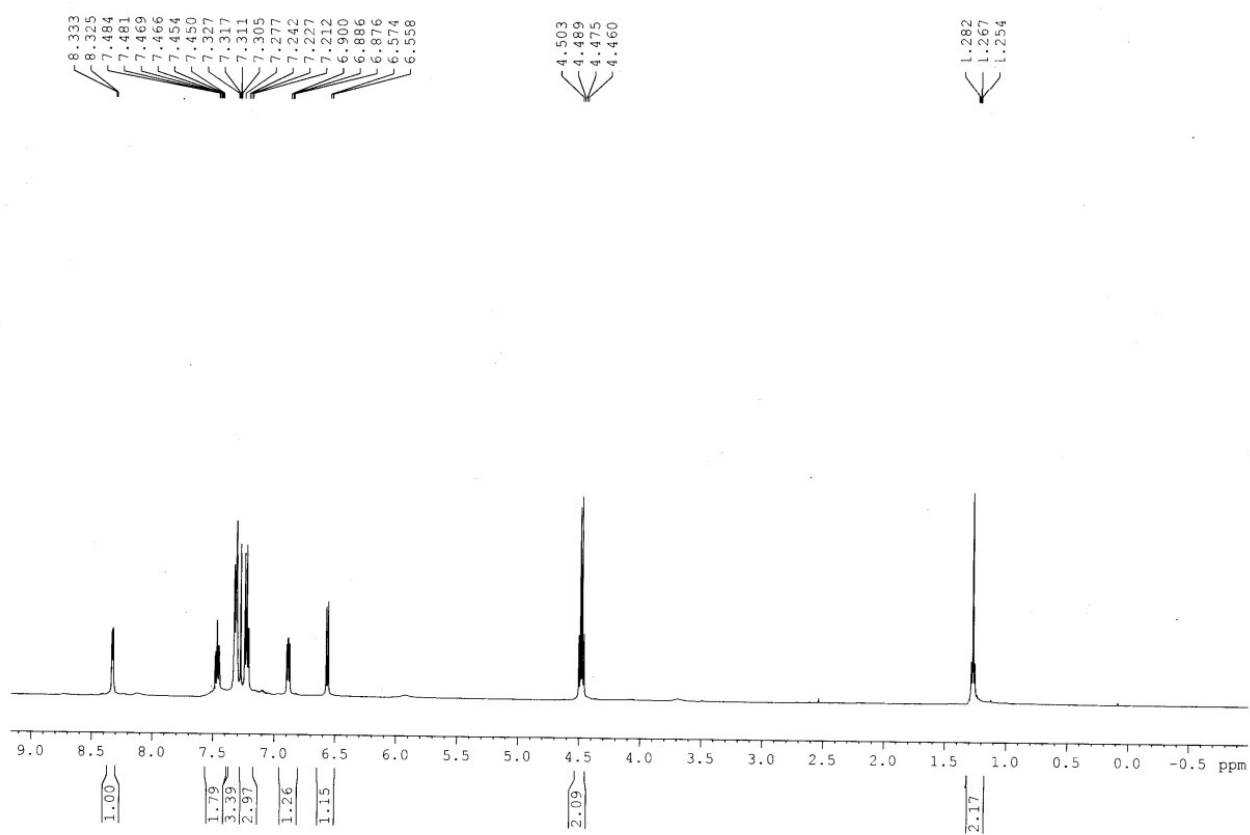

NM-S-88-13C

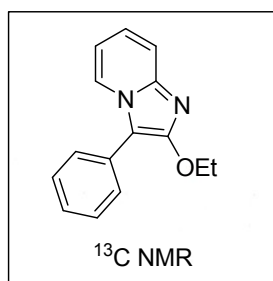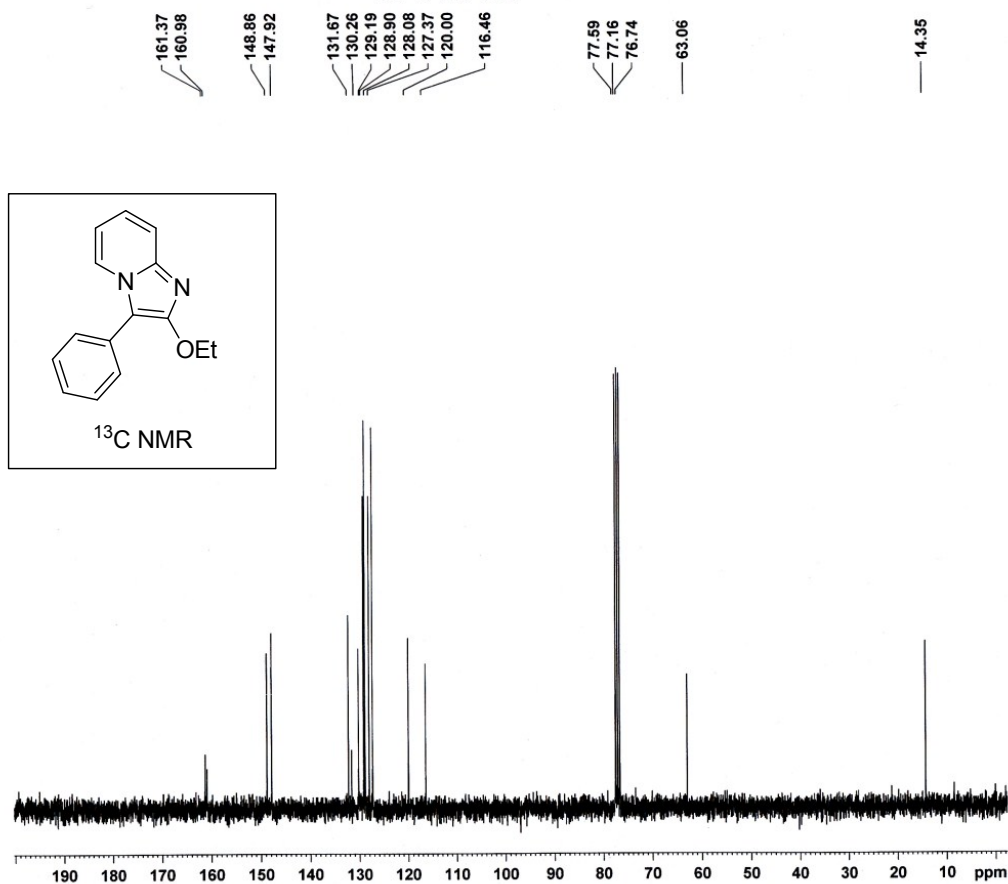

Current Data Parameters  
NAME NM-S-88-13C  
EXPNO 1  
PROCNO 1

F2 - Acquisition Parameters  
Date\_ 20150302  
Time 15.20  
INSTRUM spect  
PROBHD 5 mm PABBO BB-  
PULPROG zgpg30  
TD 32768  
SOLVENT CDCl3  
NS 84  
DS 4  
SWH 22727.273 Hz  
FIDRES 0.693581 Hz  
AQ 0.7208960 sec  
RG 210.78  
DW 22.000 usec  
DE 6.50 usec  
TE 298.8 K  
D1 2.00000000 sec  
D11 0.03000000 sec  
TD0 1

===== CHANNEL f1 =====  
SFO1 75.4752949 MHz  
NUC1 13C  
P1 9.25 usec  
PLW1 34.00000000 W

===== CHANNEL f2 =====  
SFO2 300.1312005 MHz  
NUC2 1H  
CPDPRG[2] waltz16  
PCPD2 90.00 usec  
PLW2 6.99840021 W  
PLW12 0.17545000 W  
PLW13 0.14211001 W

F2 - Processing parameters  
SI 32768  
SF 75.4677416 MHz  
WDW EM  
SSB 0  
LB 1.00 Hz  
GB 0  
PC 1.40

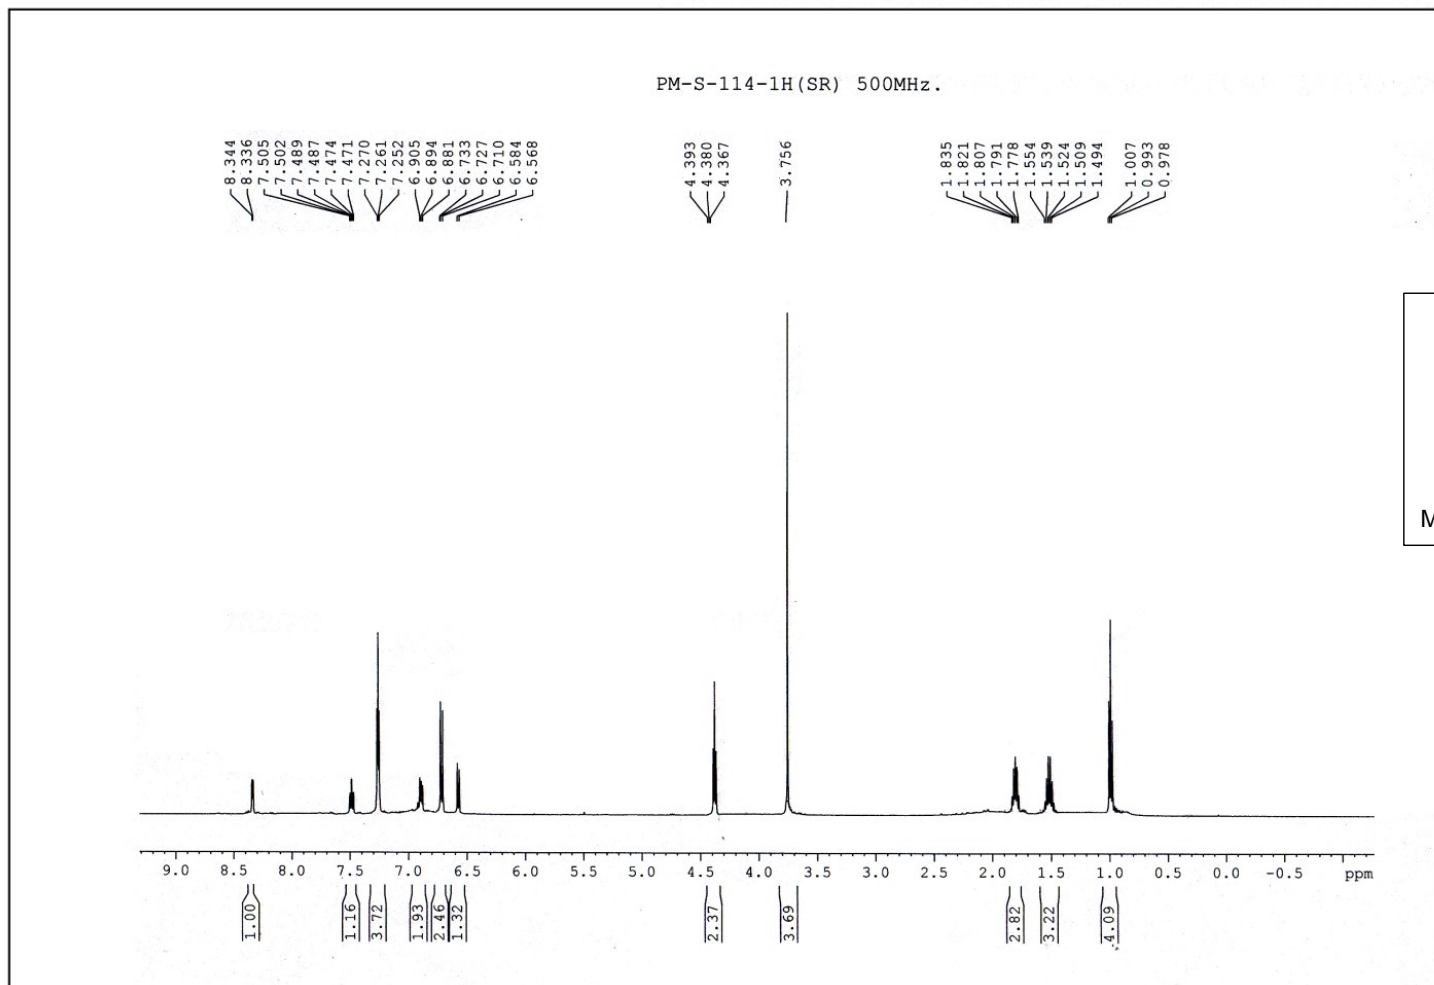

PM-S-113-1H (SR) 500MHz.

8.171  
8.161

7.296  
7.280  
7.261  
7.225  
7.209  
7.022  
7.006  
6.892  
6.882  
6.714  
6.704

4.447  
4.433  
4.419  
4.404

2.257  
2.246

1.441  
1.427  
1.413  
1.395  
1.381  
1.367

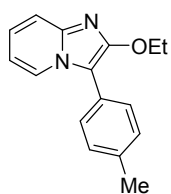

<sup>1</sup>H NMR

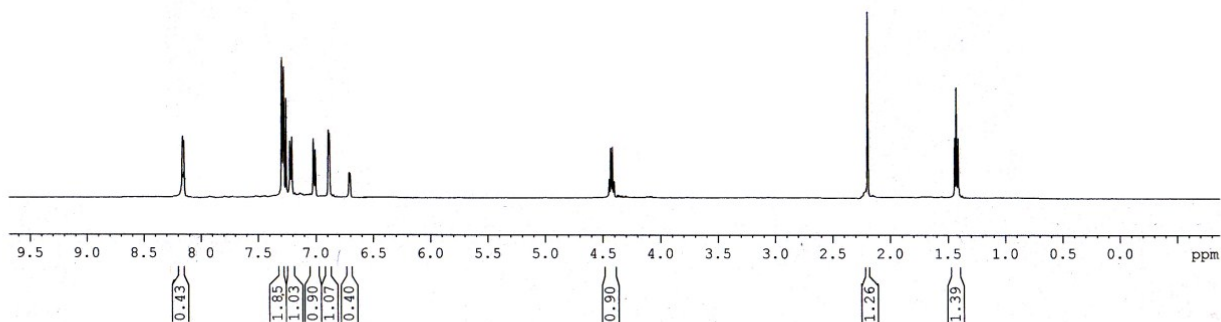

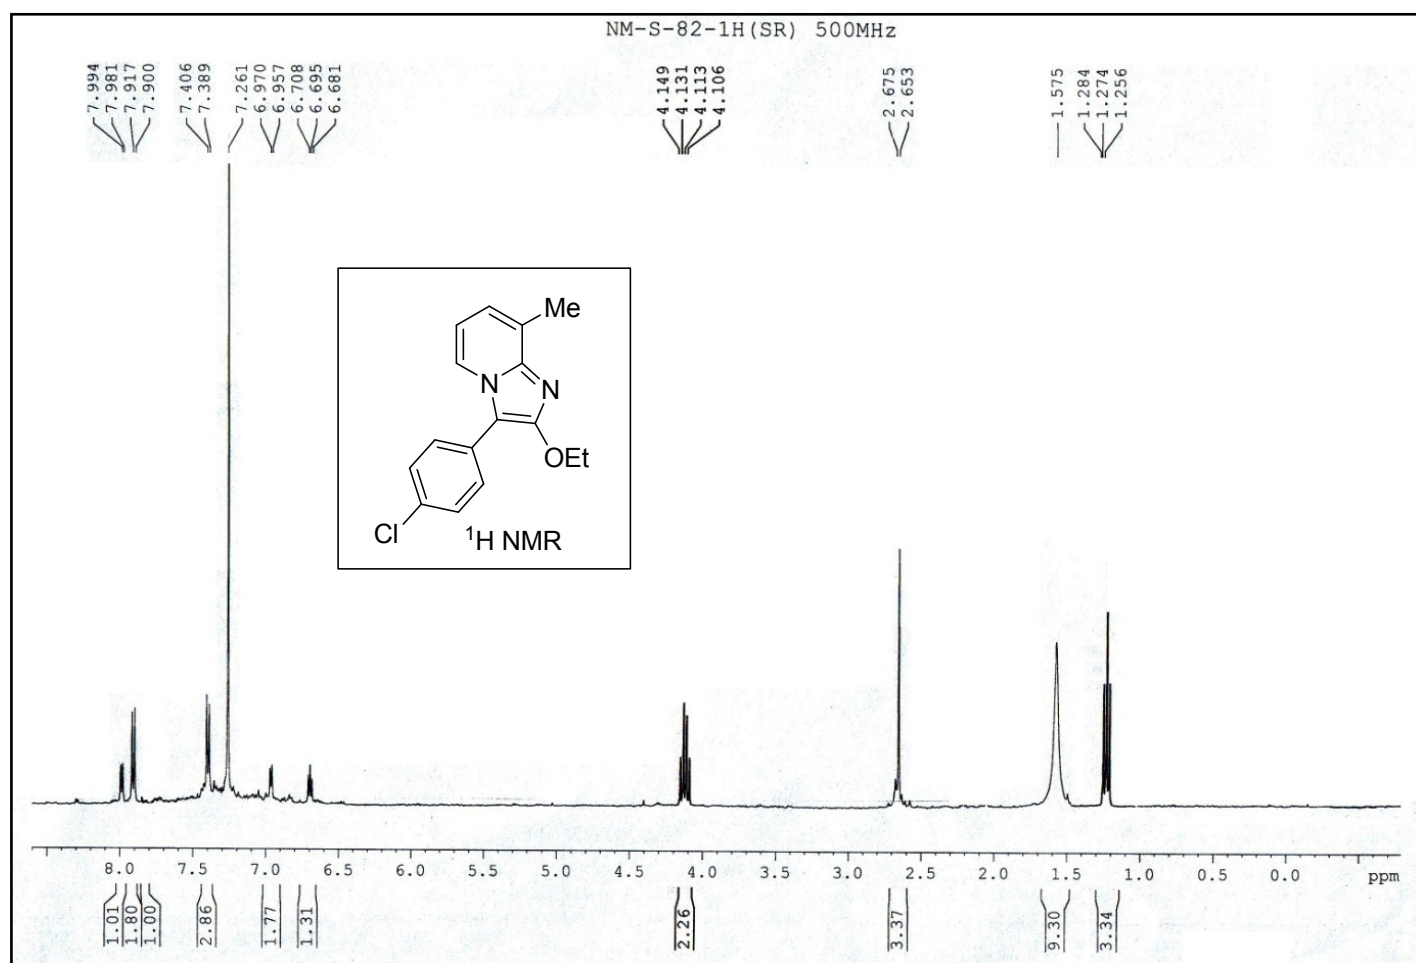

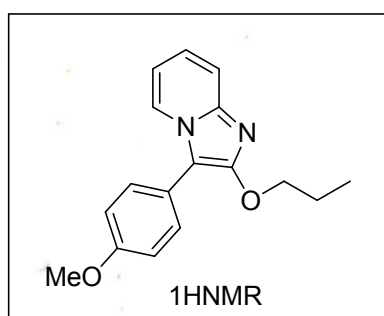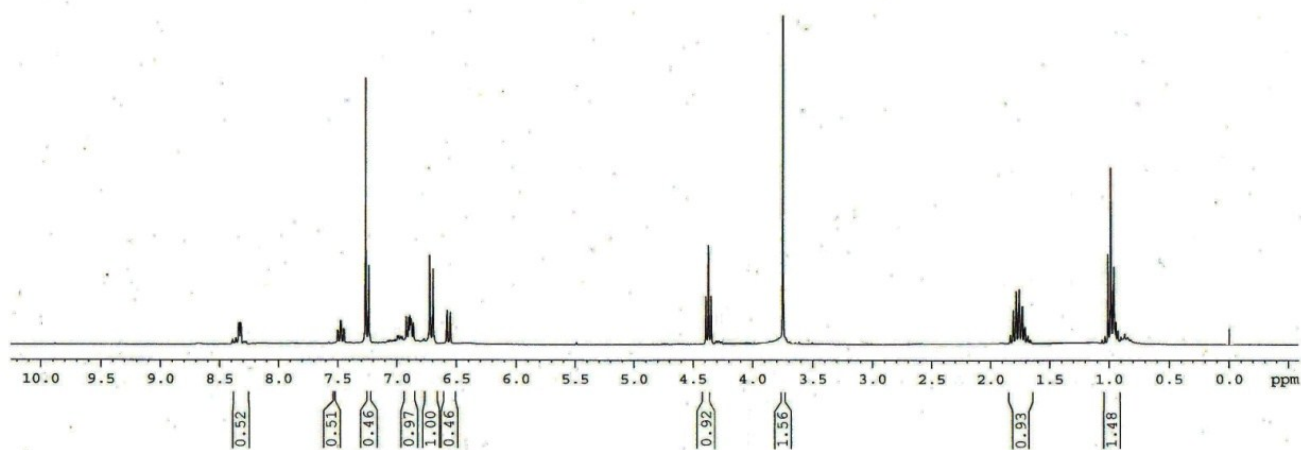

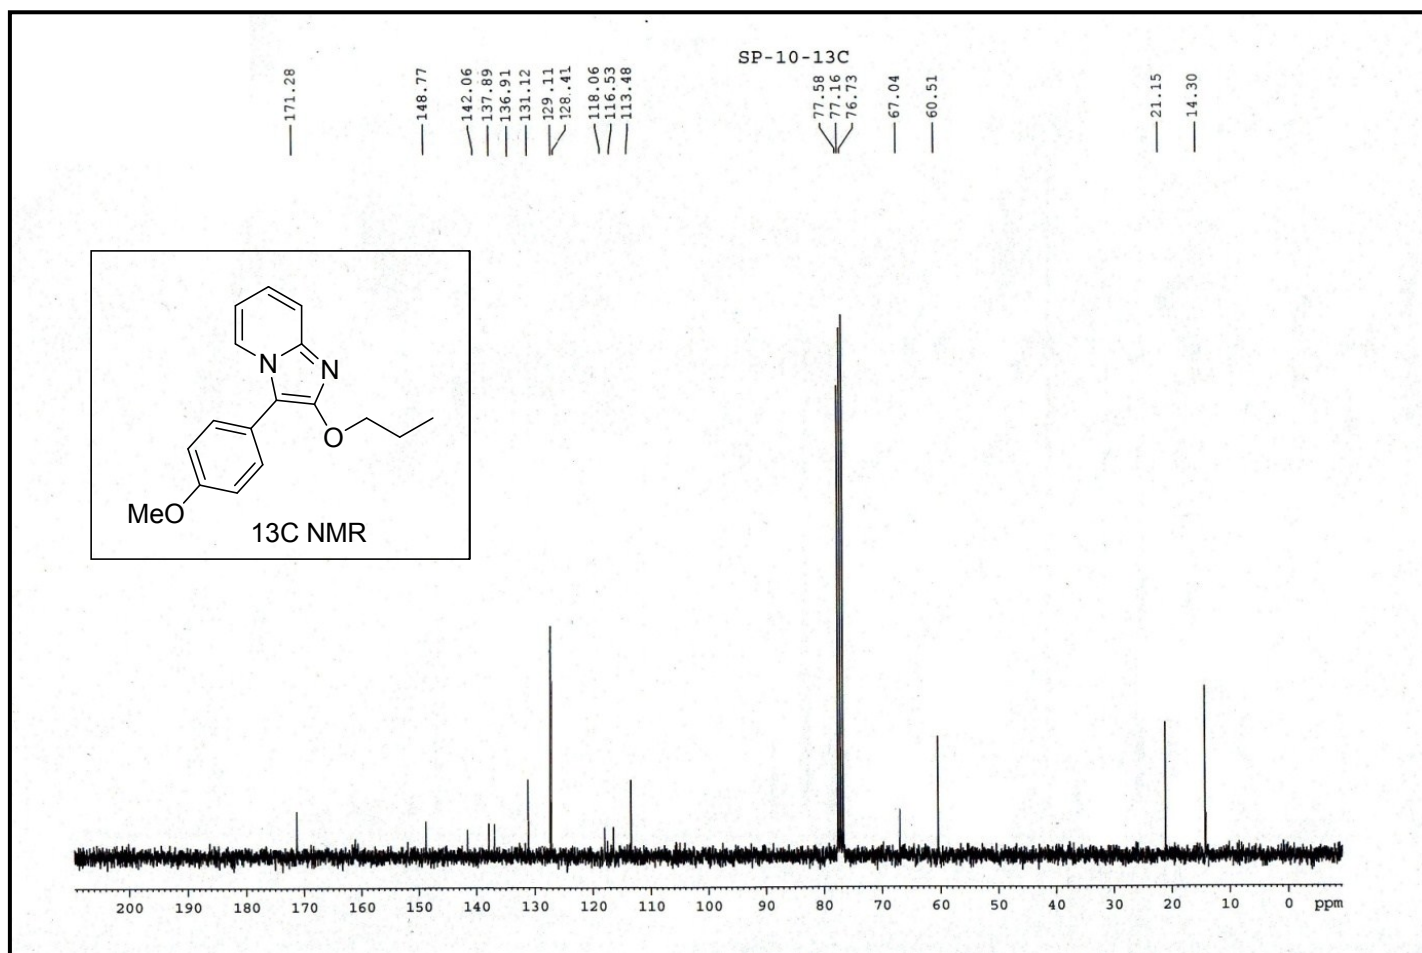

S-136-1H

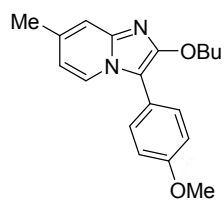

2-butoxy-3-(4-methoxyphenyl)-7-methyl  
*H*-imidazo[1,2-*a*]pyridine

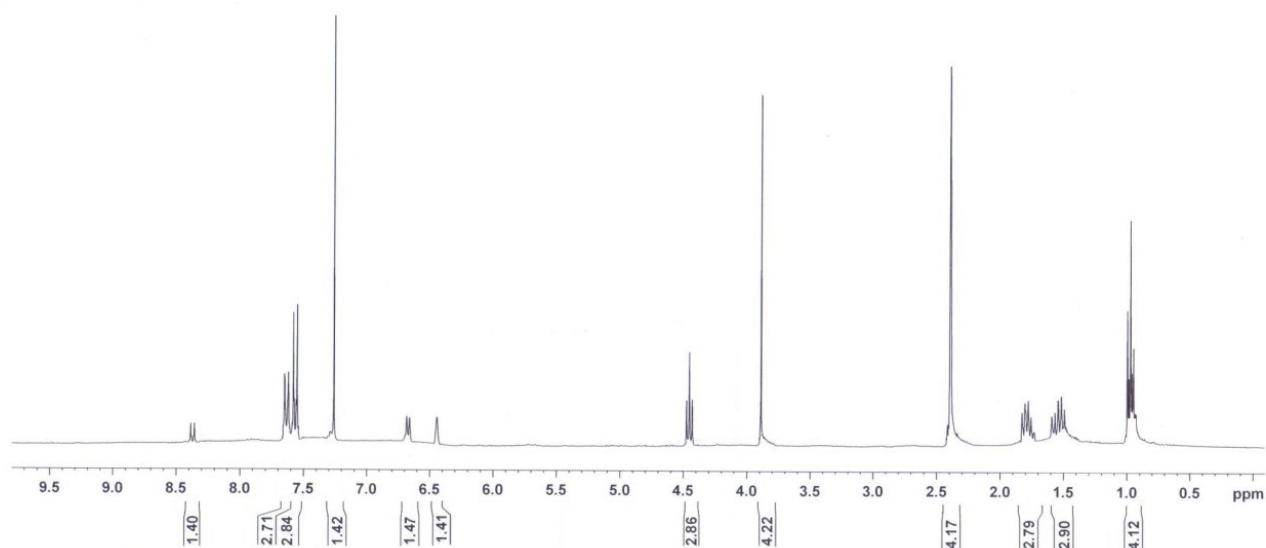

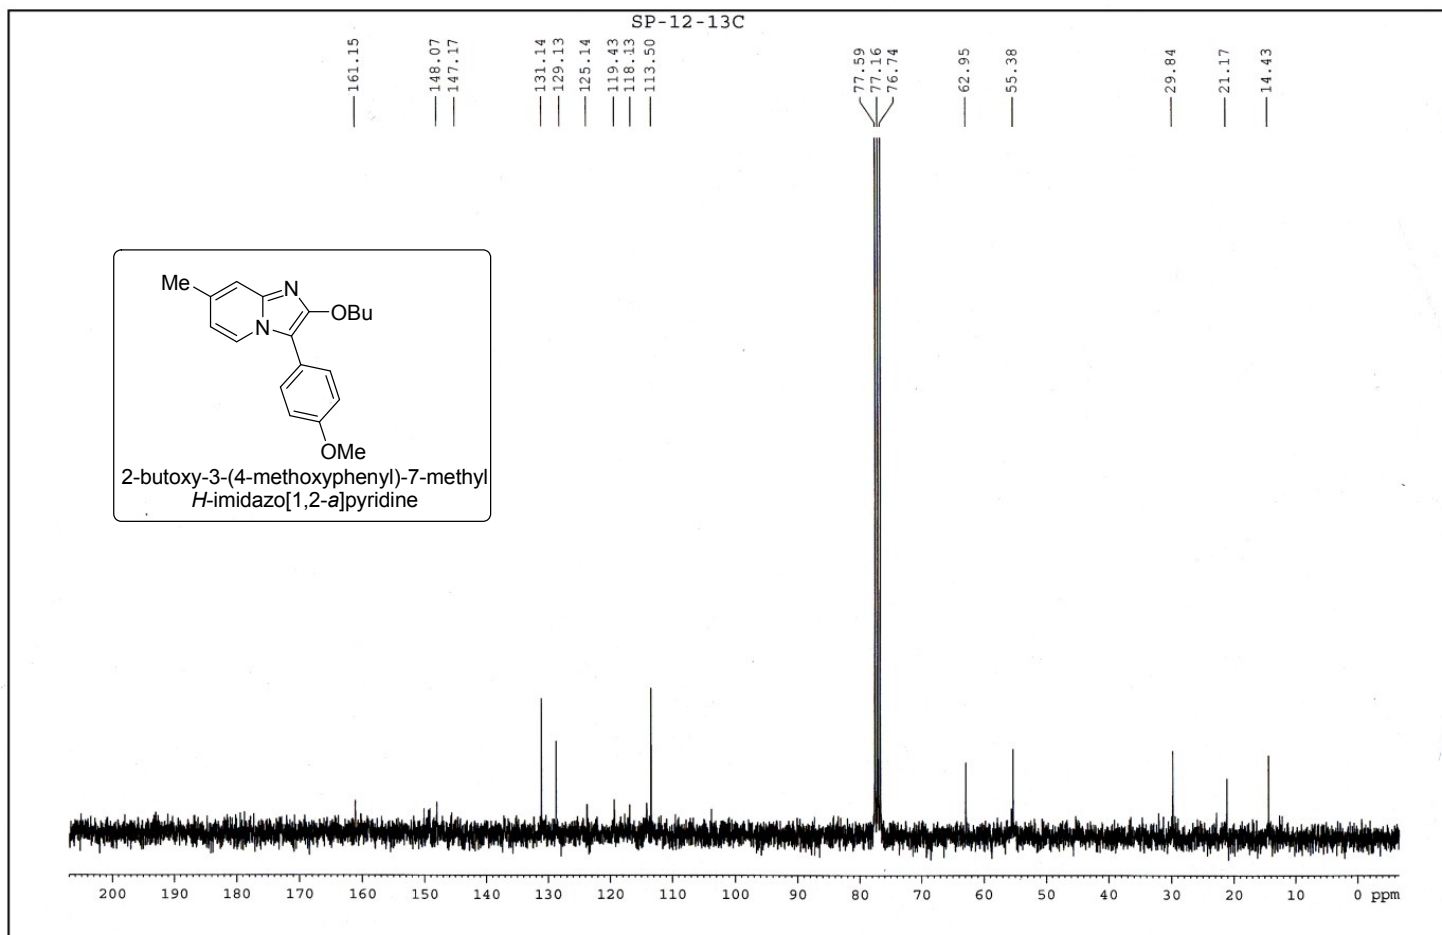

SP-12-1H

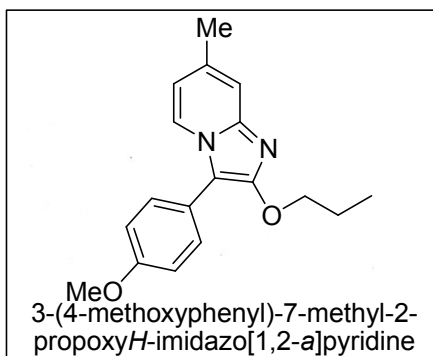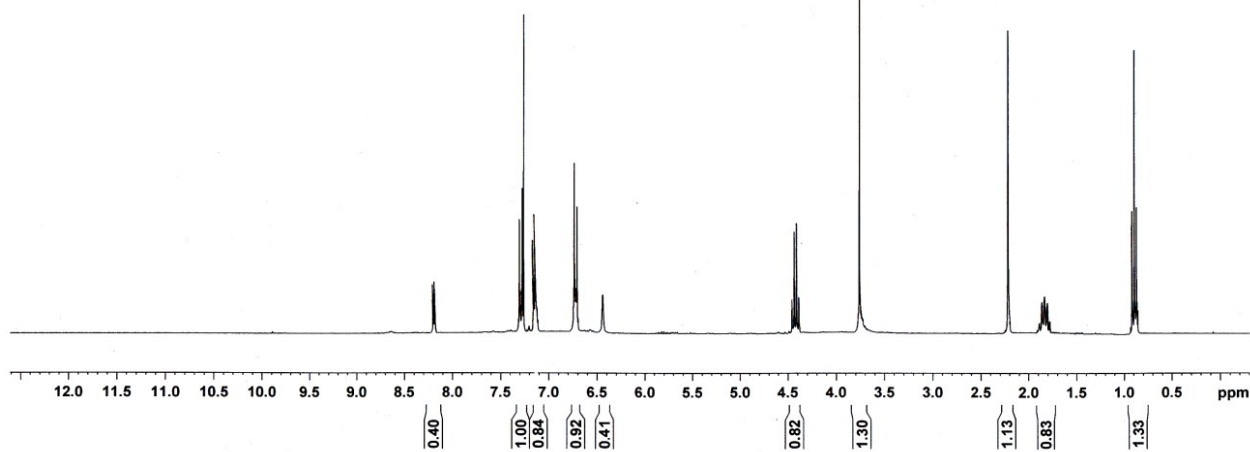

SP-11-13C

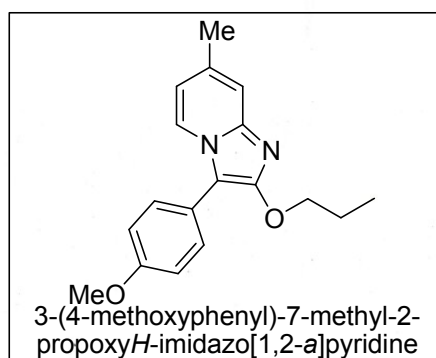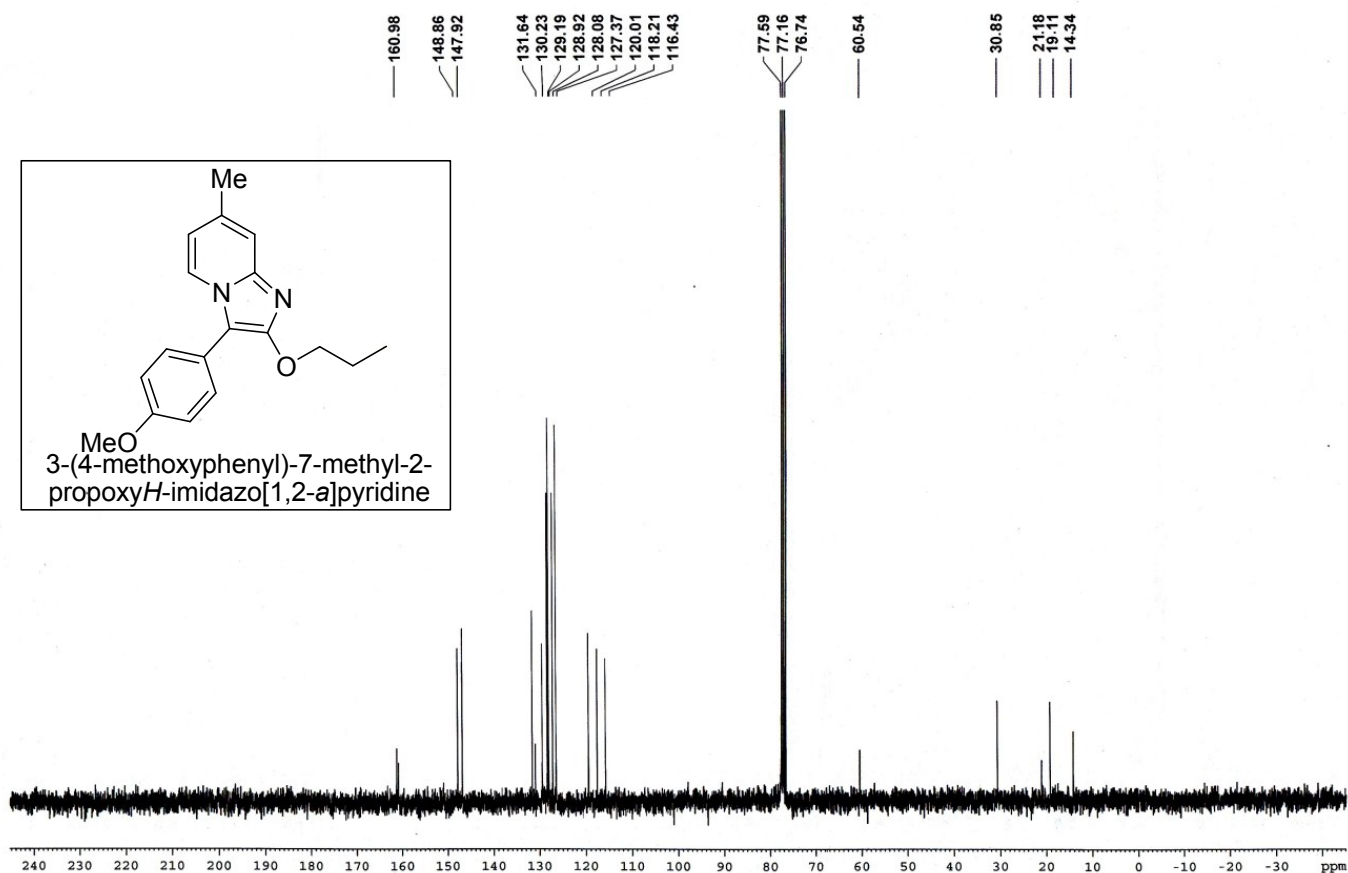

ESI9. Recyclability of Catalyst:

We have examined reusability of the catalyst for the synthesis 2-ethoxy-3-phenylimidazopyridine. After each cycle nano-NiFe<sub>2</sub>O<sub>4</sub> was recovered simply by using an external magnet, washed with ethanol and reused for subsequent reactions. The magnetic nano-catalyst was reused for eight times with minimum loss of catalytic activity (Figure 5S).

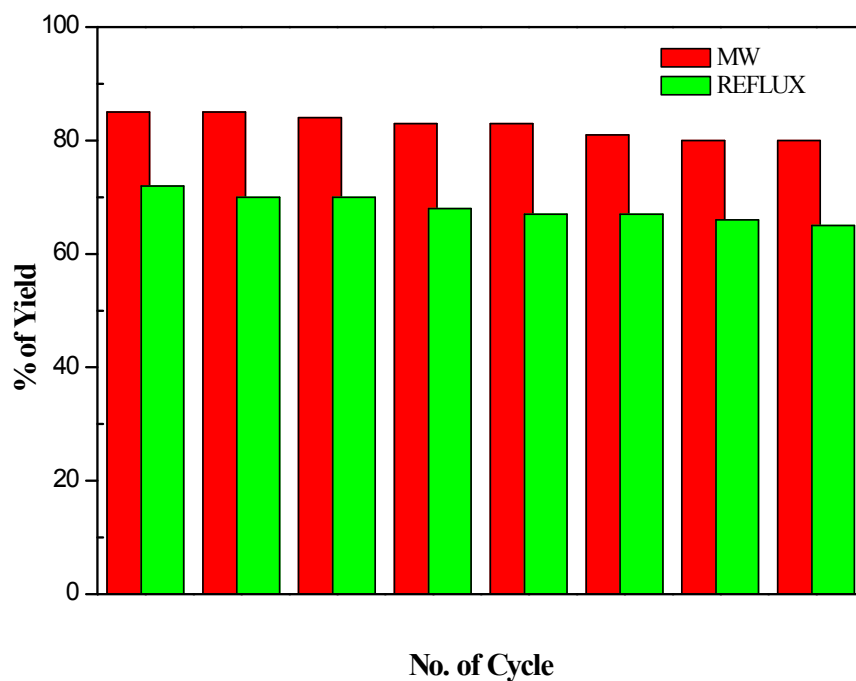

**Fig. 4S** Recyclability of nano-NiFe<sub>2</sub>O<sub>4</sub>catalyst

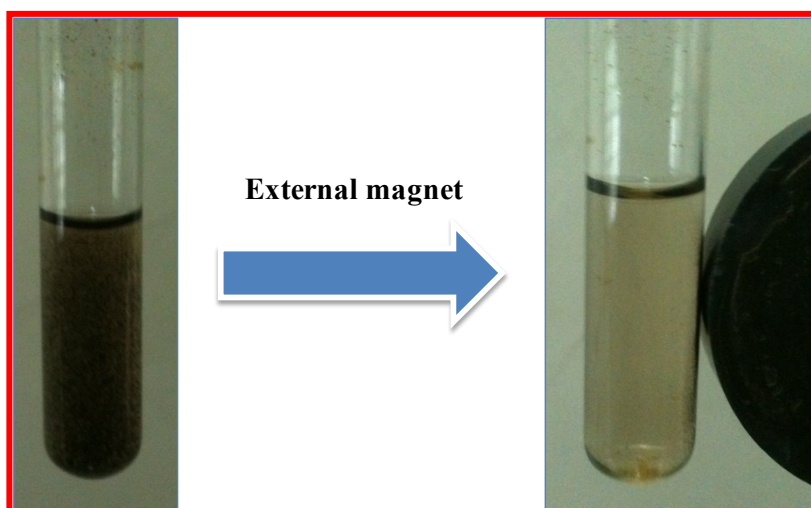

**Fig. 5S** Separation of magneticof nano-NiFe<sub>2</sub>O<sub>4</sub>catalyst by using an external magnet.

**ESI 10.References:**

- [1]. For preparation of  $\text{NiFe}_2\text{O}_4$ : P. Sivakumar, R. Ramesh, A. Ramanand, S.Ponnusamy, C. Muthamizhchelvan, *J. Alloys and Compounds*, **2013**, 563, 6–11.
- [2] Zi-You Yu, Li-Feng Chen and Shu-Hong Yu, *J. Mater. Chem.A*, **2014**, 2, 10889.
- [3] For preparation of  $\text{CuFe}_2\text{O}_4$ : K. Pradhan, S. Paul and A. R. Das, *Catal. Sci. Technol.*, **2014**, 4, 822.
- [4] For preparation of  $\text{CoFe}_2\text{O}_4$ : B. Y. Yu, S. Y.Kwak, *Dalton Trans.*, **2011**, 40, 9989
